## RESEARCH ARTICLE

## Effects of cattle on vector-borne disease risk to humans: A systematic review

Sulagna Chakraborty<sup>1\*</sup>, Siyu Gao<sup>2</sup>, Brian F. Allan<sup>1,3</sup>, Rebecca Lee Smith<sup>1,4</sup>

**1** Program in Ecology, Evolution & Conservation Biology, University of Illinois Urbana-Champaign; Urbana, Illinois, United States of America, **2** School of Social Work, The University of Minnesota, Twin Cities, Minnesota, United States of America, **3** Department of Entomology, University of Illinois Urbana-Champaign, Urbana, Illinois, United States of America, **4** Department of Pathobiology, University of Illinois Urbana-Champaign, Urbana, Illinois, United States of America

\* [schkrbr4@illinois.edu](mailto:schkrbr4@illinois.edu)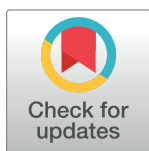

## Abstract

Vector-borne pathogens (VBPs) causing vector-borne diseases (VBDs) can circulate among humans, domestic animals, and wildlife, with cattle in particular serving as an important source of exposure risk to humans. The close associations between humans and cattle can facilitate the transmission of numerous VBPs, impacting public health and economic security. Published studies demonstrate that cattle can influence human exposure risk positively, negatively, or have no effect. There is a critical need to synthesize the information in the scientific literature on this subject, in order to illuminate the various ecological mechanisms that can affect VBP exposure risk in humans. Therefore, the aim of this systematic review was to review the scientific literature, provide a synthesis of the possible effects of cattle on VBP risk to humans, and propose future directions for research. This study was performed according to the PRISMA 2020 extension guidelines for systematic review. After screening 470 peer-reviewed articles published between 1999–2019 using the databases Web of Science Core Collection, PubMed Central, CAB International, and Google Scholar, and utilizing forward and backward search techniques, we identified 127 papers that met inclusion criteria. Results of the systematic review indicate that cattle can be beneficial or harmful to human health with respect to VBDs depending on vector and pathogen ecology and livestock management practices. Cattle can increase risk of exposure to infections spread by tsetse flies and ticks, followed by sandflies and mosquitoes, through a variety of mechanisms. However, cattle can have a protective effect when the vector prefers to feed on cattle instead of humans and when chemical control measures (e.g., acaricides/insecticides), semio-chemicals, and other integrated vector control measures are utilized in the community. We highlight that further research is needed to determine ways in which these mechanisms may be exploited to reduce VBD risk in humans.

## OPEN ACCESS

**Citation:** Chakraborty S, Gao S, Allan B.F, Smith RL (2023) Effects of cattle on vector-borne disease risk to humans: A systematic review. *PLoS Negl Trop Dis* 17(12): e0011152. <https://doi.org/10.1371/journal.pntd.0011152>

**Editor:** Job E. Lopez, Baylor College of Medicine, UNITED STATES

**Received:** February 8, 2023

**Accepted:** December 4, 2023

**Published:** December 19, 2023

**Copyright:** © 2023 Chakraborty et al. This is an open access article distributed under the terms of the [Creative Commons Attribution License](https://creativecommons.org/licenses/by/4.0/), which permits unrestricted use, distribution, and reproduction in any medium, provided the original author and source are credited.

**Data Availability Statement:** S1 Appendix in the [supporting information](#) section lists the final pool of included studies that we obtained after performing the article search on databases and screened them against our inclusion and exclusion criteria. This appendix has the names of the papers, author, publication year, country of publication, vector taxa, study implication and database source. S2 Appendix has the list of the non-systematically reviewed articles prior to year 1999.

## Author summary

Vector-borne diseases (VBDs) are caused by pathogens spread by blood-feeding arthropods from an infected to an uninfected organism. These infections may be caused by

**Funding:** This work is supported by the USDA National Institute of Food and Agriculture, Hatch project 1026333 (ILLU-875-984) (to SC) and the Sharon Gray Memorial Award from the School of Integrative Biology at the University of Illinois Urbana-Champaign (to SC and SG). The funders had no role in study design, data collection and analysis, decision to publish, or preparation of the manuscript.

**Competing interests:** The authors have declared that no competing interests exist.

pathogenic bacteria, viruses, or protozoans and arthropod vectors may spread these pathogens to humans, domestic animals, and wildlife. Humans and cattle spend a significant amount of time in close proximity with each other through various activities such as agriculture, animal husbandry, trading, and animal farming, which can potentially increase risk to human health. Previously published studies indicated cattle can impact vector-borne pathogen (VBP) transmission both positively and negatively, however, there has not been a recent synthesis of the scientific literature on this subject. Through this global systematic review of the scientific literature, we found that cattle could have either harmful or beneficial impacts on human health when it comes to VBDs, but most often increase exposure risk to VBPs in humans. We identified various mechanisms from the scientific literature by which cattle can impact VBP risk in humans. Further research is needed to better understand specific ecological mechanisms by which cattle impact human health and develop measures that will prevent and reduce VBP exposure risk in humans.

## Introduction

The ability of hematophagous arthropods to spread various infectious agents, or vector-borne pathogens (VBPs) between a wide range of organisms ultimately leads to the occurrence of vector-borne diseases (VBDs) [1]. Important arthropod vectors of infectious diseases include ticks (*Ixodoidea*), mosquitoes (*Culicidae*), sandflies (*Phlebotominae*), tsetse flies (*Glossinidae*), black flies (*Simuliidae*), and kissing bugs (*Triatominae*). For over a century, vector-borne diseases have been the subject of scientific research because of the severe concern they pose to human and animal health [2–5]. VBDs account for more than one billion cases, one million deaths, and one-sixth of worldwide disability and illnesses annually [6]. Common examples of VBDs include malaria, Lyme disease, Rift Valley fever, Chikungunya, West Nile virus and other bacterial, protozoal, and viral diseases [7]. Torto and Tchouassi [8] estimate ~80% of the world's human population is at risk of exposure to one or more VBPs. Along with their negative impacts on human and animal health, VBDs may have detrimental effects on sustainable development and can cause significant economic losses [9]. When a VBD's prevalence reaches a critical level in a country, human mobility, trade, foreign investment, savings, and land use are all likely to suffer unfavorable consequences [10]. As a direct result, VBDs are not only an increasing public health problem, but also have a negative macroeconomic impact on society. Therefore, it is vital to continue efforts to better understand, analyze, and manage health risks due to VBDs and inform effective preventative measures.

Transmission cycles for many VBPs may involve humans, domestic animals, wildlife, and various facets of their environment [11]. Environmental factors such as climate may strongly affect the rate of transmission of VBPs; for example, changing temperatures and precipitation due to climate change have been associated with an increase in vector prevalence and transmission [12]. VBP exposure risk to humans is especially increased in low-income countries, driven in part by people who are involved in occupations where they handle cattle and other livestock, notably farmers, agricultural laborers, slaughterhouse workers etc. Additionally, people who live in close proximity to cattle or are allied to animal husbandry, as well as those involved in treating and caring for livestock, often are at higher risk of VBDs [13]. Socioeconomic disparities have also been associated with increased disease incidence. Individuals in disadvantaged areas may be unaware of these diseases or associated risk factors, lack access to health facilities and infrastructure, and may follow few to no preventive measures, such as the use of insecticide-treated bed nets or vaccines [14]. Finally, some tropical VBDs, such as

leishmaniasis, are classified as neglected, and so do not receive sufficient public health attention and funding, complicating disease prevention efforts [15].

Cattle are among the most economically and culturally significant domesticated animals globally [16]. There is considerable overlap between cattle and humans through our economic activities, occupations, and cattle being a source of food and recreation [17]. Proximity between humans and cattle through agriculture, animal husbandry, and trade provides opportunities for disease transmission. Biotic factors, including age, sex, and breed of cattle and their interactions with domestic and wild animals, along with abiotic factors such as climate and environmental conditions, may influence disease transmission. These factors interact with vector species abundance, longevity, feeding cycle and bloodmeal host choice as key predictors for how VBP transmission occurs [18].

The overarching role of cattle in the spread of arthropods and VBPs in humans is a major gap in our understanding of the ecology and epidemiology of these diseases. Thus, it is important to determine if these human-cattle connections can impact human health via VBDs. Since vectors such as ticks and mosquitoes often feed on multiple host species and may spread various pathogens to humans, livestock, and wildlife, the role of cattle in VBP transmission is complicated. Cattle have various roles to play when it comes to pathogens causing vector-borne diseases. For example, they can function as bloodmeal hosts for arthropod vectors and thereby increase the abundance of vector species [19–20], and as reservoir hosts for pathogens and thereby increasing pathogen prevalence [21–22]. In contrast, cattle can be more attractive to biting vectors than humans and thereby act as shields against vector bites to humans preventing pathogen transfer in specific circumstances [23–24].

Through this systematic review, we have been able to identify multiple VBPs for which cattle have a direct or indirect role in infection transmission; however, for many VBPs, the exact role of cattle in the ecology of these diseases remains undetermined. Arguably the most contentious matter has been that of the zoo-prophylactic role of cattle (i.e., cattle acting as a barrier against pathogen transmission by absorbing vector bites and thereby having a protective effect on humans). There is a significant debate in the scientific literature over whether the presence of cattle near humans can substantially reduce disease incidence. There are studies that have both supported and failed to support the zoo-prophylactic effect of cattle on VBP risk to humans, such as in the case of malaria [25–26].

Globally, there are numerous studies that directly investigate whether cattle increase or decrease the risk of VBP exposure in humans, and yet currently, there is no synthesis of the existing information on this subject. There are various ecological mechanisms identified in previously published studies by which cattle may increase or decrease the risk of spread of VBPs in humans. We hypothesize that certain ecological mechanisms may occur repeatedly in nature across vector taxa and can significantly impact how VBPs occur in nature, but this information has not been synthesized in the literature before. These gaps can impact public health and epidemiological measures that countries can take to prevent VBPs. Thus, our goal was to conduct a systematic review of the scientific literature to synthesize and present the findings on the conditions by which cattle increase or decrease human risk of exposure to VBPs and identify and narratively describe these ecological mechanisms which impact VBPs and their spread to humans.

## Methods

### Search strategy

We conducted a systematic review of the published scientific literature to determine whether studies report a positive, negative, or neutral impact of cattle on human exposure risk to

vector-borne diseases (i.e., whether cattle increased, decreased, or had no effect, respectively) based on a rubric provided below. Following the PRISMA 2020 (Preferred Reporting Items for Systematic Reviews and Meta-Analyses) guidelines [27], we developed a search algorithm that would enable us to extract scientific papers on this subject from various databases, using the following search string:

TS = (cattle AND (tick-borne illness OR tick borne disease OR mosquito-borne illness OR mosquito borne disease OR vector-borne illness OR vector borne disease) AND human health) AND LANGUAGE: (English), year range 1999 to 2019. The decision to perform the systematic review from 1999 onwards was with the goal of focusing on recent literature in this subject and to easily access electronically available journal articles on this topic.

The initial step after developing the search string was to check if there were other systematic reviews on this topic through the Cochrane Database of Systematic Reviews. We used the keyword search comprising “cattle AND vector-borne diseases AND human health” on Cochrane, which did not yield any systematic review; it did yield one article [28] which was outside the scope of this study. Subsequently, we used the following databases to execute the search string to identify relevant articles: CABI Global Health, Web of Science Core Collection, PubMed Central and Google Scholar. Articles were also identified through forward and backward searches from citations in both included and excluded articles. Titles and abstracts of the articles identified through keyword search, forward, and backward searches were screened against the study inclusion criteria. Potentially relevant articles were retrieved for evaluation of the full text and duplicates were removed.

Full-text articles were further screened and evaluated using the full study inclusion criteria, which were: a) study should be published between 1999–2019 to ensure recency; b) study language should be in English; c) study incorporates all of the key terms: vector (specifically searched for the terms tick-borne, mosquito-borne), vector-borne disease, humans, and cattle; d) study explores a possible connection between vector, cattle, and human; e) full texts of the articles available (full texts were accessed through University of Illinois library, Google Scholar and World Cat database). Articles were excluded from the study if they met any of the following exclusion criteria: a) analysis excludes vector-borne diseases; b) study fails to mention a vector arthropod that transmits disease; c) study does not include cattle involvement; d) control studies, vaccine studies, therapeutic studies, or review papers; e) studies involving only experimental lab infection; f) studies whose full texts could not be accessed after multiple attempts from various sources; g) non-English language articles; h) studies that only include pathogens that do not cause human infection; i) studies conducted outside our time period. This review had no geographical restrictions.

Two reviewers independently assessed inclusion and exclusion criteria. A third reviewer assessed studies when the reviewers disagreed. We calculated Cohen’s Kappa statistic to estimate inter-rater agreement between the first two raters. Article search was conducted between September 30, 2019, and June 8, 2020.

Although our primary goal was to focus on performing a systematic review on articles after 1999 to capture recent information and trends, we also performed a non-systematic literature review of articles prior to 1999 using the same aforementioned keyword search. We used the databases Web of Science Core Collection, CABI Global Health and PubMed Central to perform this literature review. We used a similar approach to include and exclude articles as mentioned above but we did not include these articles in the pool of systematically reviewed articles for further analysis owing to the differences in methodologies. Therefore, we did not calculate inter-rating agreement and did not assess the study quality for these set of articles. This article search was performed between August 10, 2023, and October 30, 2023.

## Data extraction and synthesis

Methodological and outcome variables from each selected study were collected in a database, including article title, authors, publication year, country, study type, vector taxa, main implications of each study, and database source for this review. We summarized the common themes and findings of the included studies narratively. To better illustrate the impact of cattle on human health due to VBPs, we characterized the effect of cattle on VBP exposure risk to humans into three specific categories. The rubric used to generate these three categories included the following definitions, a) beneficial or positive impact: when cattle quantitatively decrease the risk of exposure to VBPs for humans, (e.g. through a decrease in vector abundance, human biting rate, or pathogen infection rate), b) harmful or negative impact: when cattle quantitatively increase the risk of exposure to VBPs for humans (e.g. through an increase in vector abundance, human biting rate, or pathogen infection rate), c) neither beneficial nor harmful impact: when there is no measurable change in risk or no statistical effect observed on human exposure risk to VBPs due to cattle.

We also identified and synthesized specific repeatedly occurring ecological mechanisms that were either investigated or proposed by the authors that contributed to human risk of exposure to VBPs by cattle. Vector taxa may have underlying differences due to their biology and other factors, and these vectors in turn adhere to various ecological behaviors due to their distinct feeding mechanisms, so we acknowledge that the mechanisms we identified through the literature are at least partially accounted for by differences between vector taxa.

We used a similar approach to extracting the information from the articles in the non-systematic literature review as mentioned above, which were collated in a separate database than the systematically reviewed articles.

## Study quality assessment

To evaluate the quality of the studies identified in the systematic review, we used The Strengthening the Reporting of Observational Studies in Epidemiology (STROBE) Statement guidelines for reporting observational studies [29]. The first two authors independently rated each included study. These articles were rated on a score ranging from 0–2, depending on whether the criteria were unmentioned or  $< \frac{1}{4}$  met (0),  $\frac{1}{4}$ – $\frac{3}{4}$  met (1), or  $> \frac{3}{4}$  met (2). The following were the critical criteria used in rating the study quality: (a) was the research question clearly stated? (b) what was the study design and study setting used? (c) what was the sample size used? (d) were the subjects in the study representative of the target population? (e) were the main findings clearly described? (f) were there any confounding variables? (g) did the researchers use appropriate analytical methods? and (h) was the study located in the predefined area of interest? The study quality score measured the strength of study evidence for reporting here, but studies were not excluded based on quality.

## Results

### Study selection, Inter-rater agreement & Study quality assessment

We screened 470 articles through a keyword search using our search algorithm. The number of articles identified from each database, and the number of articles included and excluded in our review, are listed in Fig 1. After the removal of 12 duplicates, we identified 458 unique articles. Out of these, 331 did not meet the inclusion criteria. The remaining 127 articles are the final pool of studies included in this systematic review. S1 Appendix provides the complete reference list of all studies that were finally included after performing the database search. Cohen's Kappa statistic for inter-rater agreement between two raters was calculated to be

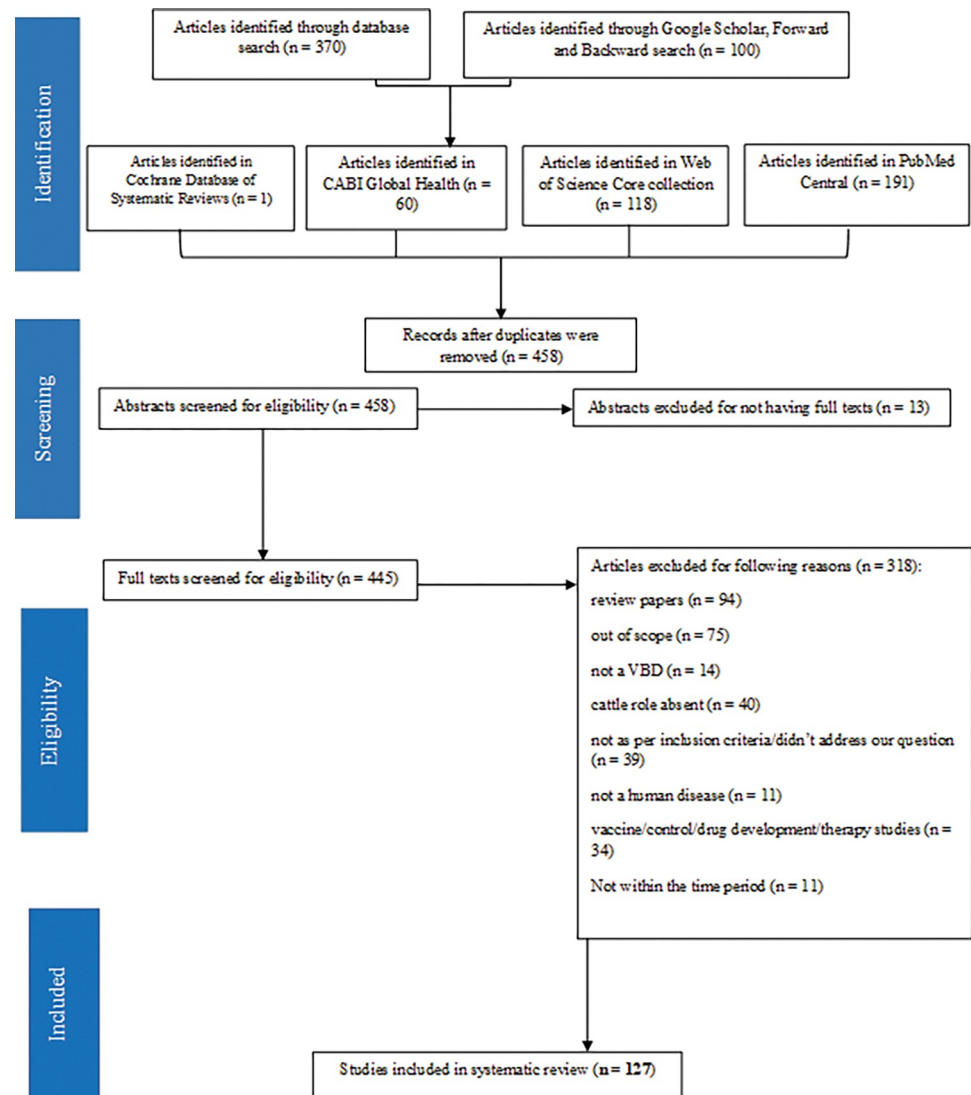

**Fig 1. Flowchart for the systematic review process.**

<https://doi.org/10.1371/journal.pntd.0011152.g001>

0.835, indicating strong agreement between the article reviewers [30]. Averaging the ratings provided by two members who conducted the study quality assessment, the reviewed studies averaged a score of 1.22 out of 2, with a standard deviation of 0.55 for 127 articles.

Information regarding the non-systematically reviewed articles is available in the [S2 Appendix](#). In the literature review of articles prior to 1999, we identified a total of 226 articles, and, after screening, 36 articles met the inclusion criteria.

### Study characteristics

The most common study methods used by researchers worldwide were observational studies, studies that utilized molecular biology, phylogenetic, and genetic techniques, mathematical modeling studies, and entomological studies. Several studies involved more than one research method or study design to collect various kinds of data from the study population. In addition, several articles that we reviewed published prior to 1999 tended to be review articles or





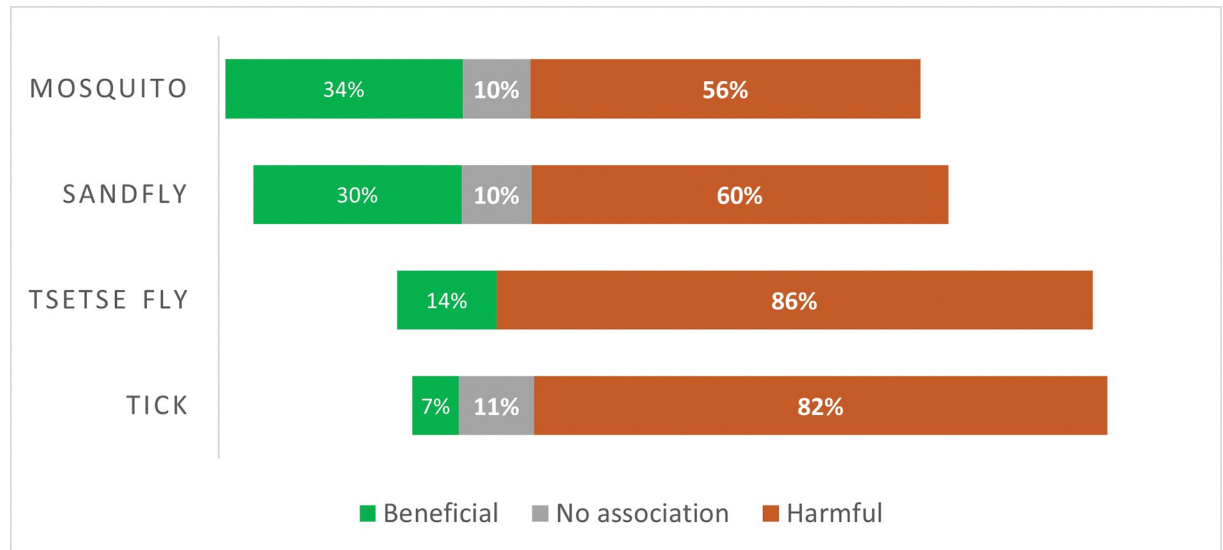

**Fig 3. Cattle impact on risk of exposure to vector-borne pathogens on human health, divided into beneficial, harmful and no effect by major vector taxon, covered in this review.**

<https://doi.org/10.1371/journal.pntd.0011152.g003>

As per our hypothesis, we identified various mechanisms repeated across these published studies by which cattle can positively or negatively impact the human exposure risk to VBPs (Table 2). We have defined these mechanisms briefly below and in Table 2. Seven mechanisms were identified by which cattle have been shown to impact VBP exposure risk in humans. We have developed a figure (Fig 4- graphical abstract) to illustrate these seven identified mechanisms from the systematic review. We also recorded the number of times the papers within our included studies invoked one or more of these mechanisms.

**Mechanism I: Diversion and attraction of vector blood meals.** There is considerable evidence in the published literature to support scenarios in which there is a zoo-prophylactic effect of cattle on human health. Zoo-prophylaxis occurs when the presence of cattle can function as a barrier against potential vector bites and as an alternative host that deflects blood meals away from humans. This mechanism was observed 16 times in the included studies.

The opposite of zoo-prophylaxis is zoo-potential, whereby livestock contribute to an increase in VBP transmission by attracting vector bites to humans; this often occurs where livestock are housed within or near human sleeping quarters and for vector species that prefer human hosts, such as with some species of mosquitoes that can spread human malaria [24]. We observed this mechanism within our included studies 18 times.

**Mechanism II: Modification of the environment.** A second mechanism by which cattle may impact VBP risk is through physical modification of the environment. Cattle may modify the environment, making it suitable or unsuitable for certain vectors, thereby impacting VBP exposure. We found 6 instances when this mechanism was discussed in our pool of studies.

**Mechanism III: Incompetent host.** Cattle have been found to be an incompetent reservoir host species for certain vector-borne pathogens such as the causative agent for Lyme disease [56] and Japanese encephalitis [99]. This mechanism was only observed 3 times within our pool of studies.

**Mechanism IV: Competent host.** In other cases, cattle may serve as competent reservoirs, maintenance hosts, quality source of bloodmeals or amplifying hosts for several vector-borne diseases. In some circumstances, cattle can maintain vector-borne pathogens in their system that remain undetected, which may cause an outbreak when the right conditions arise [100].



**Table 1. Role of cattle on risk of exposure to vector-borne pathogens in humans from studies included in this systematic review.**

| Vector-borne disease                                                                | Vector                                                                                                                                                                                                                         | Role of cattle                                                           | Selected Sources                                      |
|-------------------------------------------------------------------------------------|--------------------------------------------------------------------------------------------------------------------------------------------------------------------------------------------------------------------------------|--------------------------------------------------------------------------|-------------------------------------------------------|
| Rift Valley fever (RVF) in humans                                                   | Mosquitoes (primary vector- <i>Aedes</i> species, secondary vector <i>Culex</i> species)                                                                                                                                       | Harmful. (See Table 2: 4–6)                                              | [33–35]                                               |
| Human malaria                                                                       | Mosquitoes (female <i>Anopheles</i> species)                                                                                                                                                                                   | Both harmful and beneficial effects observed. (See Table 2: 1, 4, 7)     | [18,24,36–41]                                         |
| Japanese Encephalitis (JE)                                                          | Mosquitoes ( <i>Culex</i> species)                                                                                                                                                                                             | Beneficial and potentially harmful effects observed. (See Table 2: 1, 3) | [42–43]                                               |
| Chagas disease                                                                      | Kissing bug ( <i>Triatoma brasiliensis brasiliensis</i> )                                                                                                                                                                      | Potentially harmful (See Table 2: 1, 4)                                  | [44–45] (Not part of included studies)                |
| West Nile Virus (WNV) infection in humans                                           | Mosquitoes ( <i>Culex</i> species)                                                                                                                                                                                             | Possibly harmful but in rare instances (debatable) (See Table 2: 4)      | [46–47,48] (Not part of included studies)             |
| St. Louis Encephalitis (SLE) infection in humans                                    | Mosquitoes ( <i>Culex</i> species)                                                                                                                                                                                             | Potentially harmful (See Table 2: 4)                                     | [49]                                                  |
| Human African Trypanosomiasis (HAT) or sleeping sickness                            | Tsetse fly ( <i>Glossina</i> species)                                                                                                                                                                                          | Harmful & Beneficial. (See Table 2: 4–7)                                 | [50–54]                                               |
| Lyme Disease                                                                        | Ticks ( <i>Ixodes scapularis</i> , <i>Ixodes pacificus</i> , <i>Ixodes ricinus</i> )                                                                                                                                           | Beneficial (See Table 2: 2–3)                                            | [55–56]                                               |
| Crimean-Congo hemorrhagic fever (CCHF)                                              | Ticks (primary vector <i>Hyalomma</i> species; secondary vector <i>Rhipicephalus</i> , <i>Haemaphysalis</i> and <i>Dermacentor</i> species)                                                                                    | Harmful and Beneficial (See Table 2: 4–5, 7)                             | [31,32,57–61]                                         |
| Human anaplasmosis                                                                  | Ticks ( <i>Ixodes scapularis</i> , <i>Ixodes pacificus</i> , <i>Ixodes Ricinus</i> , <i>Ixodes persulcatus</i> )                                                                                                               | Harmful (See Table 2: 4, 6)                                              | [62–65]                                               |
| Human babesiosis                                                                    | Ticks ( <i>Ixodes scapularis</i> , <i>Ixodes ricinus</i> )                                                                                                                                                                     | Harmful (See Table 2: 6)                                                 | [66–69] (Not all papers are part of included studies) |
| Dugbe virus infection in humans                                                     | Ticks ( <i>Hyalomma</i> , <i>Amblyomma</i> and <i>Rhipicephalus</i> species)                                                                                                                                                   | Harmful and Beneficial (See Table 2: 4, 7)                               | [70–72]<br>[31,32]                                    |
| Thogoto virus infection in humans                                                   | Ticks ( <i>Rhipicephalus praetextatus</i> )                                                                                                                                                                                    | Potentially beneficial (See Table 2: 7).                                 | [31,32]                                               |
| Alkhurma/Alkhumra hemorrhagic fever (AKHV)                                          | Ticks ( <i>Ornithodoros savignyi</i> , <i>Hyalomma dromedari</i> )                                                                                                                                                             | Harmful (See Table 2: 5)                                                 | [73–75] (Not all papers are part of included studies) |
| Kyasanur Forest Disease (KFD) in humans                                             | Ticks ( <i>Haemaphysalis spinigera</i> , <i>Haemaphysalis turturis</i> )                                                                                                                                                       | Harmful (See Table 2: 4–6)                                               | [76–79] (Not all papers are part of included studies) |
| Human ehrlichiosis                                                                  | Ticks ( <i>Amblyomma americanum</i> , <i>Ixodes scapularis</i> )                                                                                                                                                               | Harmful (See Table 2: 4)                                                 | [64,80]                                               |
| Tickborne Encephalitis Virus (TBEV) infection in humans                             | Ticks ( <i>Ixodes ricinus</i> , <i>Ixodes persulcatus</i> , <i>Haemaphysalis punctata</i> , <i>Dermacentor marginatus</i> )                                                                                                    | Harmful (See Table 2: 4, 6)                                              | [81,82]                                               |
| African tick bite fever (ATBF) in humans                                            | Ticks ( <i>Amblyomma variegatum</i> , <i>Amblyomma hebraeum</i> )                                                                                                                                                              | Harmful (See Table 2: 4)                                                 | [83–85] (Not all papers are part of included studies) |
| Rocky Mountain Spotted Fever (RMSF)                                                 | Ticks ( <i>Dermacentor variabilis</i> , <i>Amblyomma americanum</i> , <i>Rhipicephalus sanguineus</i> , <i>Amblyomma cajennense</i> )                                                                                          | Harmful (See Table 2: 4)                                                 | [86]                                                  |
| Spotted fever group (SFG) rickettsioses in humans                                   | Ticks ( <i>Amblyomma maculatum</i> , <i>Rhipicephalus</i> , <i>Dermacentor</i> , <i>Hyalomma</i> and <i>Ixodes</i> species)                                                                                                    | Harmful (See Table 2: 4)                                                 | [22,83,87,88]                                         |
| Q fever infection in humans                                                         | Ticks ( <i>Dermacentor</i> species, <i>Hyalomma</i> species, <i>Haemaphysalis</i> species, <i>Rhipicephalus</i> species, <i>Ixodes</i> species)                                                                                | Harmful (See Table 2: 4–5)                                               | [89–91]                                               |
| Cutaneous Leishmaniasis and Visceral Leishmaniasis (Kala azar) infections in humans | Sandfly ( <i>Lutzomyia gomezi</i> , <i>Lutzomyia longipalpis</i> , <i>Lutzomyia ovallesi</i> , <i>Phlebotomus argentipes</i> , <i>Phlebotomus papatasi</i> , <i>Phlebotomus sergenti</i> , <i>Sergentomyia squamipleuris</i> ) | Both harmful and beneficial effects observed. (See Table 2: 2, 4, 7)     | [92–98]                                               |

<https://doi.org/10.1371/journal.pntd.0011152.t001>

This was the most commonly observed mechanism (found 63 times) in our systematic review and appears to be a better studied mechanism than some of the other mechanisms mentioned here.

**Table 2. Mechanisms identified from included studies by which cattle impact vector-borne pathogen exposure risk in humans, their definitions, and sources.**

| Potential mechanisms of cattle                                                                    | Definition of mechanism                                                                                                                                                                                                                                                                                        | Select vector-borne diseases                                                                                                                                                                                                                                                                                                                                                                                | Effect on human health | Sources                                                                          |
|---------------------------------------------------------------------------------------------------|----------------------------------------------------------------------------------------------------------------------------------------------------------------------------------------------------------------------------------------------------------------------------------------------------------------|-------------------------------------------------------------------------------------------------------------------------------------------------------------------------------------------------------------------------------------------------------------------------------------------------------------------------------------------------------------------------------------------------------------|------------------------|----------------------------------------------------------------------------------|
| 1A. Diversion of blood meals away from humans.<br>1B. Attraction of vectors to humans.            | 1A: Cattle serve as barriers/shields against vectors and divert bloodmeals away from humans thereby having a protective effect on human health.<br>1B: Cattle can increase the density or abundance of vectors in the environment in the presence of humans, thereby having a negative effect on human health. | Malaria<br>Malaria                                                                                                                                                                                                                                                                                                                                                                                          | Beneficial<br>Harmful  | [18,24,40,104]<br>[18,24,39]                                                     |
| 2. Modification of the environment.                                                               | 2A. Cattle physically modify the environment around them to make it unsuitable for vectors, thus having a positive impact on human health.<br>2B. Cattle physically modify the environment around them to make it suitable for vectors, thus having a negative impact on human health.                         | Lyme disease,<br>Leishmaniasis<br>Leishmaniasis                                                                                                                                                                                                                                                                                                                                                             | Beneficial<br>Harmful  | [55,93,94]<br>[96,97]                                                            |
| 3. Incompetent host                                                                               | Cattle serve as incompetent hosts for vectors and pathogens, having a protective effect on human health.                                                                                                                                                                                                       | Lyme disease, Japanese encephalitis                                                                                                                                                                                                                                                                                                                                                                         | Beneficial             | [43,55,56,99]                                                                    |
| 4. Competent host (maintenance/reservoir of pathogens, quality source of blood meals for vectors) | Cattle can serve as a good bloodmeal host for vectors, or act as a reservoir for vectors to acquire infection from and spread that to humans, or help amplify vector-borne pathogens in the environment, having negative impacts on human health.                                                              | Tick-borne rickettsial diseases, Human African Trypanosomiasis (HAT), Kyasanur Forest Disease (KFD), Anaplasmosis, African Tick Bite fever, Rocky Mountain Spotted fever, tick-borne Dugbe virus, Malaria, Q fever, Leishmaniasis, West Nile virus, Ehrlichiosis, Chagas disease, Japanese encephalitis, St Louis encephalitis, CCHF, Tick-borne encephalitis, Chandipura virus, Bhanja virus, Calovo virus | Harmful                | [18,22,44,46,49,50,63,64,65,70,71,76,79,81,83,84,86,89,90,105,106,107,108,48,88] |

(Continued)

Table 2. (Continued)

| Potential mechanisms of cattle                                                                    | Definition of mechanism                                                                                                                                                                                                                                                    | Select vector-borne diseases                                                                                                                                                                                | Effect on human health | Sources                                                 |
|---------------------------------------------------------------------------------------------------|----------------------------------------------------------------------------------------------------------------------------------------------------------------------------------------------------------------------------------------------------------------------------|-------------------------------------------------------------------------------------------------------------------------------------------------------------------------------------------------------------|------------------------|---------------------------------------------------------|
| 5. Direct contact between cattle or cattle by-products and humans affecting pathogen transmission | Humans come into contact with cattle and cattle by-products through handling, treating, caring, processing, or through consumption of such substances, leading to exposure to VBPs in humans.                                                                              | Crimean Congo Hemorrhagic fever (CCHF), Kyasanur Forest Disease (KFD), tick-borne encephalitis, Alkhurma/Alkhumra hemorrhagic fever, Q fever, Rift Valley fever (RFV), Human African Trypanosomiasis (HAT). | Harmful                | [33,50,53,73,75,76,77,81,82,89,90,109,106,110,91]       |
| 6. Pathogen transmission through cattle movements and interaction with wildlife/other animals.    | Cattle introduce new vector-borne pathogens or vectors into geographic areas which did not previously have these vectors, and/or pathogens present; or cattle interact with other animals resulting in pathogen spillover; all of these negatively impacting human health. | Rift Valley fever, Kyasanur Forest Disease, Human African Trypanosomiasis, Anaplasmosis, Tick-borne encephalitis                                                                                            | Harmful                | [34,50,64,68,76,101,111,102,103,112,110,113]            |
| 7. Impact of insecticidal/ acaricidal treatment of cattle on pathogen transmission.               | Cattle are treated with pesticides specific to vectors, reducing the burden of VBPs in the community and having a protective effect on human health.                                                                                                                       | Malaria, Human African Trypanosomiasis, Onchocerciasis, tick-borne pathogens, Leishmaniasis, CCHF, Thogoto virus and Dugbe virus                                                                            | Beneficial             | [31,32,37,38,50,51,114,115,116,117,118,119,120,121,122] |

<https://doi.org/10.1371/journal.pntd.0011152.t002>

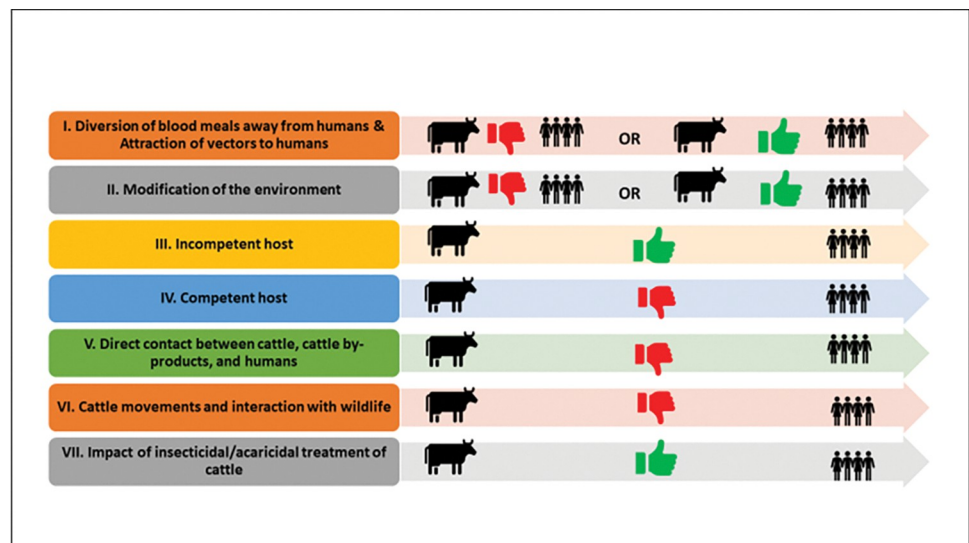

Fig 4. Figure depicting the seven mechanisms identified through the systematic review illustrating how cattle can impact VBP exposure risk in humans.

<https://doi.org/10.1371/journal.pntd.0011152.g004>

**Mechanism V: Direct contact between cattle or cattle by-products and humans affecting pathogen transmission.** Direct contact of humans with cattle or cattle by-products such as skin, body fluids, milk, meat, etc. which, if infected with vector-borne pathogens, can cause various VBDs in humans. These contacts can occur through handling of cattle, through consumption of milk and meat, through caring for and treating cattle, through slaughtering meat, and while processing cattle carcasses and products without taking proper preventive measures. This is the second most commonly observed mechanism in the reviewed literature, with a count of 28 times.

**Mechanism VI: Pathogen transmission through cattle movements and interaction with wildlife/other animals.** Movement of animals from disease-endemic to non-endemic places and the interaction between cattle and other animal species during grazing activities can also result in geographic spread of VBPs to new foci [101, 102, 103]. We observed this mechanism 26 times in our included pool of studies.

**Mechanism VII: Impact of insecticidal/acaricidal treatment of cattle on pathogen transmission.** A major beneficial impact of cattle on VBP exposure risk in humans is through the treatment of cattle with insecticides/acaricides. Treatment of cattle with pesticides specific to vectors can significantly reduce the burden of VBPs in the environment thereby having a major beneficial impact on the health of humans and animals [21,40,52]. We observed this mechanism in our included pool of studies 17 times.

We also performed a non-systematic literature review of articles prior to 1999 across three databases. There were several papers that did not meet the inclusion criteria or did not necessarily investigate all three elements of this research topic i.e., vector, cattle, and a vector-borne disease of humans, or whose full texts were inaccessible or were review papers. It was interesting to note that early research on Q fever dismissed the vector-borne route of infection in humans, but then later research indicated the important role played by both cattle and ticks in causing Q fever in humans [91,123]. Papers that did meet inclusion criteria echoed that cattle can have a positive or negative impact on VBP exposure risk in humans [e.g., 48,54,91,99,104,108,123].

## Discussion

Cattle and other livestock animals are principal elements in agriculture, animal husbandry, trade, economic activities as well as in cultural practices of people around the world. People who are in close contact with cattle due to employment, commerce, or for traditional reasons often are at higher risk for contracting various vector-borne and zoonotic diseases [13,124].

We identified a critical gap in the scientific literature about the various roles cattle can play in impacting vector-borne pathogen exposure risk in humans. We systematically reviewed articles from the scientific literature to synthesize the available information to better understand how cattle impact VBP exposure risk in humans. We categorized the impacts of cattle on VBP exposure risk in humans based on the aforementioned rubric by effect (positive, negative, neutral) and by vector taxa (mosquitoes, sandflies, ticks, tsetse flies). As per our hypothesis, we also identified seven ecological mechanisms repeatedly described from the previously published literature by which cattle positively or negatively impact VBP exposure risk in human health. Research on this topic has been concentrated geographically in countries located in sub-Saharan Africa and southern Asia. Cattle appear to have both beneficial and harmful impacts on human health with respect to VBDs, but they tend to overwhelmingly increase the risk of exposure to VBPs in humans. The effects of cattle on VBP exposure risk in humans depends on various ecological conditions, on the vector taxa along with other environmental factors.

In order to understand the mechanisms by which cattle can impact the risk of human exposure to vector-borne pathogens, we define some key terms here, which are sometimes used inconsistently in the literature we reviewed. A reservoir is defined as one or more epidemiologically connected populations of host species in which the pathogen can be permanently maintained and from which infection is transmitted [125]. A maintenance population can be defined as a host population in which a pathogen persists because the population size is greater than the critical community threshold [125,126]. An amplifying host is an organism in which an infectious agent (such as a virus or bacterium) that is pathogenic for some other species is able to replicate rapidly and to high concentrations [127], as evidenced in the case of Japanese encephalitis virus for which pigs are the amplifying host species [109]. The ability to obtain and transmit pathogens to other organisms refers to the competence of the host in transmitting that infection [128]. We discuss the seven identified mechanisms below and their implications on human health.

### **Mechanism I: Diversion and attraction of vector blood meals**

The phenomenon of zoo-prophylaxis (cattle forming a protective barrier against vector blood-meals) has been observed and studied greatly in the context of malaria [24,26,39,129,130]. Contrastingly, there is also evidence of instances when zoo-prophylaxis has not been observed [25,39,114,104,130–134]. Multiple studies indicate that certain requirements/conditions need to be present for zoo-prophylaxis to occur [24,26,38]. In the case of malaria specifically, these conditions are a) zoophilic and exophilic vector, b) habitat separation between human and host animal quarters, and c) augmentation of zoo-prophylaxis with insecticide treatment of animals or co-intervention of long-lasting insecticide-treated nets and/or indoor residual spraying. The presence or absence of these requirements might explain to a certain extent why cattle may or may not always be observed to be zoo-prophylactic.

As opposed to zoo-prophylaxis, the improved availability of blood meals by increasing the presence of cattle increases mosquito survival, which counters the beneficial impact of diverting blood meals on endemic and epidemic malaria [114]. Tirados et al [130] showed in field studies that in outdoor conditions, cattle had no prophylactic effect on humans, but the presence of cattle outside with humans indoors had some protective effect. Clearly, the mere presence of cattle may not always be sufficient to protect humans from malaria-carrying mosquitoes. Cattle may attract more vectors [135], and they can increase the local abundance of specific vectors which can lead to VBDs in both cattle and humans, such as tick-borne pathogens, malaria and leishmaniasis.

### **Mechanism II: Modification of the environment**

Cattle can physically modify the environment around them to make it suitable or unsuitable for vector survival. For example, cattle can modulate the risk for Lyme disease by reducing the prevalence of questing vector ticks in a managed pasture [55]. In this study, cattle modified the vegetation by their grazing, thereby rendering the microclimate more arid and making the environment less suitable for the survival of ticks. Another instance where cattle may have a beneficial impact on human exposure is the case of Leishmaniasis: Bern et al [93] found that household cattle ownership was associated with a lower risk of contracting the infection and the presence of large numbers of cattle around houses had a protective effect. Conversely, research by Singh et al [97] found that one of the primary vectors of Leishmaniasis in India, *Phlebotomous argentipes*, preferred to mate in cattle sheds and in soils that were more alkaline than in human houses, whereas another vector *P. papatasi* preferred the soil of human houses with neutral pH. Similarly, Chorley [136] demonstrated that *Glossina pallidipes*, vector of HAT



are attracted to the scent of cattle dung and cattle urine, which can have a negative impact on HAT exposure risk in humans. These serve as examples where cattle may modify environments to be more suitable for vector survival and where it can have a negative and positive effect on human health depending on the ecological attributes of the vector.

### **Mechanism III: Incompetent host**

As mentioned before, cattle are incompetent hosts for certain vector-borne pathogens, thereby having a beneficial impact on human health such as in the case of Lyme disease and Japanese encephalitis. Non-infected ticks that feed on cattle fail to acquire spirochetes, but also infected ticks may even lose their infection during the course of blood meals from cattle [55]. Similarly, Samuel et al [43] reported that a decrease in the cattle-to-pig ratio might be one of the reasons for an increase in Japanese encephalitis virus (JEV) infection among children in India. Pigs are competent reservoir hosts for JEV, whereas cattle are dead-end hosts for JEV, and the presence of cattle may have a protective effect on humans.

### **Mechanism IV: Competent host**

The ability of cattle to be a good source of bloodmeals for vectors and reservoirs of infection in the environment has negative consequences on human health. For example, in the case of Human African Trypanosomiasis (HAT), cattle along with pigs serve as reservoirs of human infective *Trypanosoma brucei rhodesiense* and also serve as blood meal hosts for the tsetse fly vector [50,137]. Cattle have been found to harbor all life stages of ticks that can spread Kyasanur Forest Disease virus (KFDV) to humans and have also been found to maintain a low level of the KFDV infection without succumbing to the disease [76,78,138]. Cattle are reservoirs for the pathogens that cause human anaplasmosis and can be co-infected with two or more *Anaplasma* species simultaneously [63,139,140]. Cattle can be reservoirs for several species of tick-borne rickettsial pathogens as well [22,87]. Cattle are also known to maintain tick-borne Dugbe virus in the environment, which primarily affects children [71,72]. Cattle and other ungulates are important reservoirs of the causative agent of Q fever, *Coxiella burnetii* [141,142,91].

### **Mechanism V: Direct contact between cattle or cattle by-products and humans affecting pathogen transmission**

Several sources indicate that consumption of dairy products from infected cattle (i.e., after they have been bitten by ticks) or consumption of infected meat itself are risk factors for diseases spread by vector arthropods, such as Crimean Congo hemorrhagic fever (CCHF), tick-borne encephalitis, Rift Valley Fever (RVF), and Alkhurma/Alkhumra hemorrhagic fever [59,73,81,101,143]. Handling both live and dead infected cattle and contact with raw animal skins and body fluids of infected cattle can also be risk factors for CCHF and RVF [61,106,144]. Various studies have also shown that people working in professions in close contact with cattle, such as veterinary professionals, abattoir workers, butchers, farm workers, live-stock handlers, traditional pastoralists, tannery workers, and human health professionals, are at risk of contracting CCHF, RVF, HAT, Q fever and other VBDs, either through direct contact with cattle or indirectly via vector bites on the cattle [28,33,57,59,106,143,145,146]. In addition, congregations of large herds of cattle with humans due to trade and religious festivals at trading posts, live animal markets, quarantine facilities, and slaughterhouses, allow for more opportunities for VBP transmission such as in the cases of RVF and CCHF [58,102,111,147].

### **Mechanism VI: Pathogen transmission through cattle movements and interaction with wildlife/other animals**

Omondi et al [64] state that wildlife translocations from areas with vector presence to areas without vector presence can also lead to VBP transmission. Diseases that typically are rare in humans, such as babesiosis, have been found to increase due to the dissemination of pathogens through cattle movement [68]. Movement of otherwise free-ranging cattle to forest and back into villages have been hypothesized to be a risk factor in the spread of Kyasanur Forest Disease in India [78,79,148]. Rutto et al [50] showed that in areas where untreated cattle, humans and other livestock come into contact with each other, especially during dry periods at watering points, there can be risk of bovine and human trypanosomiasis transmission. Murase et al [112] demonstrated that cattle might be contracting *Anaplasma phagocytophilum* from contact with wildlife that could be easily transmitted to humans in Japan. In a review by Glover [54], the author stated that cattle migrations are responsible for introducing different species of tsetse flies in areas where they were previously absent. Similar to mechanism V, anthropogenic activities, and areas such as trading posts, wet markets, religious festivals etc. where there are congregations of cattle, humans, and other domestic or wild animals; afford opportunities for spillover of pathogens from one species to another [111,147,149,150].

### **Mechanism VII: Impact of insecticidal/acaricidal treatment of cattle on pathogen transmission**

There is research that shows treatment of cattle with insecticides is associated with a significant decrease of malarial vectors in the environment when used in conjunction with insecticide-treated bed-nets, indoor residual spraying, and other vector control approaches [37,38,114,115,151–154]. When cattle are treated with insecticides against tsetse flies or trypanocides against the parasites, it reduces the abundance of vectors and parasites, thus preventing transmission of HAT [50–52,54,155]. Insecticidal or acaricidal treatment of cattle also have positive impacts in controlling other mosquito vectors [116], blackflies [117], leishmaniasis [118–120] and preventing tick-borne diseases in non-integrated ecosystems [121,122].

Acaricidal treatment of cattle can also have beneficial impacts on wildlife and livestock integrated communities. Allan et al [31] and Keesing et al [32] describe that in such integrated communities in Kenya, treatment of cattle with acaricides can reduce the abundance of host-seeking ticks in the environment. This could also improve the health of wildlife, domestic animals and humans that co-occur in such shared ecosystems. Treatment of the cattle with specific acaricides reduced the abundance of host-seeking nymph and adult life stages of several tick species (vectors of diseases such as CCHF, Thogoto virus and Dugbe virus), thereby reducing the potential for disease transmission. Interactions between cattle and wildlife can have important epidemiological consequences. For example, Ruiz-Fons et al [156] found that in game reserves in Spain, where cattle and ungulates coexist, cattle abundance influenced the prevalence of *B. burgdorferi* sensu lato and *A. phagocytophilum* in *I. ricinus* nymphal ticks. Increasing abundance of cattle seemed to increase the risk of other hosts becoming infected by *A. phagocytophilum*, while reducing the risk of becoming infected by *B. burgdorferi* sensu lato.

Treatment of cattle with insecticides, either topically or through ingestion, can reduce the circulating parasites in the environment along with the targeted vector species, thereby reducing the disease burden and vectorial capacity of the vectors. However, the efficacy of insecticide treatment of cattle is dependent not just on the feeding preferences of the vector but also on behavioral adaptations of vectors, potential development of resistance among the vectors and parasites, and potential negative consequences for the environment [41,152,157–159]. If the targeted vector species in an area are all anthropophilic, then there has to be a multi-

pronged approach to control the vectors and VBPs in that area. We hypothesize that when cattle are treated with insecticides and/or vectors preferentially feed on cattle, cattle likely reduce VBP exposure risk in humans by deflecting vector blood meals away from humans and/or reducing the abundance of vectors in the environment. Conversely, when vectors prefer to feed on humans and/or cattle are not treated with insecticides, cattle are likely to increase VBP exposure risk in humans by contributing to an increase in vector abundance, attracting vectors to feed on humans, and/or serving as pathogen reservoir hosts that can transmit the infection to vector arthropods. This intricate interaction between vector feeding/biting preferences and insecticide treatment of cattle has important implications for human health.

Treatment of cattle with various insecticides to prevent pathogen transmission is a critical step in vector control. As mentioned before, the complex interaction between vector feeding preference and insecticidal treatment of cattle has important implications on human health and not all barriers to insecticide application are biological in nature. For instance, factors such as inadequate market infrastructure, poor awareness, the expensive nature of treatments, and local policy enforcement failures can lead to low rates of cattle treatment [50,103]. There is research underway to investigate alternative methods that can be used to control vectors and thereby, vector-borne diseases, such as the use of plant-based odor baits [160] and semio-chemicals.

Semio-chemicals are organic compounds that function as signals and enable intra- and inter-specific chemical communication [161]. The information conveyed is used for modulating physiological and behavioral activities through the olfactory and taste systems [161]. Mosquitoes use a variety of sensory cues to find their prey which can differ depending on the specific life stages of the mosquito [162]. Various semio-chemicals have been identified that mosquitoes use during oviposition, mating, sugar feeding and host-seeking [162]. When semio-chemicals are applied to cattle and livestock, they can attract specific vectors to cattle and then kill the vectors [163]; or they can disrupt mating in the vector [164]; additionally, they can be used to repel vectors from finding their preferred hosts (e.g., humans) [164]. The search is on for other alternative methods or compounds that can be used in vector control methods that might be less environmentally harmful. For instance, Singh et al [97] evaluated the application of plant products at potential sandfly breeding sites to reduce soil pH which might help prevent vector mating and can be a useful alternative to chemical insecticides for sandfly control/management. Other vector control approaches being developed include gene drive technology [165], infection of *Aedes* mosquitoes with *Wolbachia* to prevent VBP spread [166,167], and a variety of environmental modifications [167].

### **No effect/no association of cattle on VBP exposure risk**

There were some papers that met our inclusion criteria and yet did not explicitly study the impact of cattle on human exposure risk to VBPs [168,169]. In addition, other studies found unclear associations between cattle and VBD risk in humans [170–176]. As we found few such papers in our pool, this indicates the need for diversity of study designs and research methodologies that might better investigate the impact of cattle on VBP exposure risk in humans.

### **Limitations**

It is important to consider study limitations. For the systematic review, we opted to focus on more recent papers, i.e., papers published after 1999. For the non-systematic literature review even though we did look at articles prior to 1999, there were papers whose full texts we were not able to retrieve, papers that were predominantly reviews or perspective pieces or papers that did not examine this topic. Hence, we chose 1999 as the cutoff point for the systematic review, to access papers that investigated this topic and to easily access electronically the

majority of peer-reviewed articles on this topic. There may be articles published on this topic in languages other than English that we could not include, and there have been review articles published which we did not include as well. In some articles, it was difficult to parse out the effects of cattle from the effects of other livestock since some studies group cattle as part of multiple livestock species, despite our specific use of the term 'cattle' instead of 'livestock' in our search algorithm. Of note, since this systematic review encompasses information from multiple fields such as ecology, epidemiology, parasitology etc., certain terms/jargons and concepts are interchangeably used, making this a challenging question to answer. Finally, our evaluation of mechanisms by which cattle affect VBP exposure risk in humans was dependent on mechanisms invoked by the authors of these studies, some of which were supported by experimental evidence, but others based on field observations or informed opinions.

### Future recommendations and research

The role of cattle in VBP exposure risk in humans can be complicated and can prove to be beneficial or harmful in the context of specific VBPs and in specific settings. We recommend future studies explicitly study the various mechanisms by which cattle impact vector-borne pathogen exposure risk in humans, as more than one mechanism may operate in specific environmental contexts. We encourage researchers to use a wider variety of study designs than just modeling, serology, molecular analyses, cross-sectional, and retrospective methods. Apart from human and animal health, other factors such as cultural practices, societal norms, age, sex, occupation, human activities and behaviors, and seasonality can predispose individuals to vector-borne diseases. More research is needed to investigate all these factors as well as identify situations in which cattle can be zoo-prophylactic beyond the well-studied example involving human malaria. Since published studies tended to be concentrated from a few specific regions, more research and funding on this topic from other geographic areas (e.g., North America) might yield interesting results. The results from this research could inform public health measures globally to prevent and reduce vector-borne pathogen exposure risk in humans. Policy measures, increased funding, and public awareness are all critical steps in the fight against vector-borne diseases since many vectors are opportunistic and can parasitize many different host species.

### Conclusion

The goal of this comprehensive systematic review was to determine the impact of cattle on human health with respect to vector-borne diseases. Our results show that cattle often increase VBP exposure risk in humans, but there is evidence to show that cattle can have a beneficial impact on human health as well. Our hypothesis was that certain mechanisms involving cattle, vectors and humans occur repeatedly in nature with important consequences for VBP exposure risk and spread in humans. Through this systematic review we identified and narratively described seven mechanisms from the literature through which cattle can impact VBP exposure risk in humans; these mechanisms are dependent on ecological conditions, vector taxa and other environmental factors. In addition, some mechanisms are less studied than others and require further investigation. Hence, it is critical for future studies to delve deeper into the many ways cattle, humans, wildlife, and vectors interact in the environment and develop holistic measures that can be used to protect humans and animals from VBDs as well as prevent negative side effects on the environment.

### Supporting information

**S1 PRISMA Checklist. Completed PRISMA 2020 checklist.**  
(PDF)

**S1 Appendix. This is the list of the final pool of included studies in this systematic review.**  
(XLSX)

**S2 Appendix. This is the list of papers that were reviewed for the non-systematic literature review.**

(XLSX)

## Acknowledgments

We would like to thank Kelli Trei, Biosciences Librarian and Associate Professor at the University of Illinois Urbana-Champaign, who helped us in the study search process.

## Author Contributions

**Conceptualization:** Sulagna Chakraborty, Rebecca Lee Smith.

**Data curation:** Sulagna Chakraborty, Siyu Gao.

**Formal analysis:** Sulagna Chakraborty, Siyu Gao, Brian. F. Allan, Rebecca Lee Smith.

**Funding acquisition:** Sulagna Chakraborty.

**Investigation:** Sulagna Chakraborty, Siyu Gao, Brian. F. Allan, Rebecca Lee Smith.

**Methodology:** Sulagna Chakraborty, Brian. F. Allan, Rebecca Lee Smith.

**Project administration:** Rebecca Lee Smith.

**Resources:** Sulagna Chakraborty, Brian. F. Allan.

**Software:** Sulagna Chakraborty, Siyu Gao.

**Supervision:** Brian. F. Allan, Rebecca Lee Smith.

**Validation:** Siyu Gao, Rebecca Lee Smith.

**Visualization:** Sulagna Chakraborty, Brian. F. Allan.

**Writing – original draft:** Sulagna Chakraborty, Rebecca Lee Smith.

**Writing – review & editing:** Sulagna Chakraborty, Siyu Gao, Brian. F. Allan, Rebecca Lee Smith.

## References

1. Santiago PB, de Araújo CN, Motta FN, Praça YR, Charneau S, Bastos IMD, et al. Proteases of hematophagous arthropod vectors are involved in blood-feeding, yolk formation and immunity—a review. *Parasit Vectors*. 2017; 10(1), 1–20.
2. Athni TS, Shocket MS, Couper LI, Nova N, Caldwell IR, Caldwell JM, et al. The influence of vector-borne disease on human history: socio-ecological mechanisms. *Ecol Lett*. 2021; 24(4), 829–846. <https://doi.org/10.1111/ele.13675> PMID: 33501751
3. Campbell-Lendrum D, Manga L, Bagayoko M, & Sommerfeld J. Climate change and vector-borne diseases: what are the implications for public health research and policy? *Philos Trans R Soc Lond B Biol Sci*. 2015; 370(1665), 20130552. <https://doi.org/10.1098/rstb.2013.0552> PMID: 25688013
4. Stuchin M, Machalaba CC, & Karesh WB. Vector-borne diseases: animals and patterns. In *Global health impacts of vector-borne diseases: Workshop summary*. National Academies Press (US); 2016.
5. Day MJ. One health: the importance of companion animal vector-borne diseases. *Parasit Vectors*. 2011; 4(1), 1–6. <https://doi.org/10.1186/1756-3305-4-49> PMID: 21489237
6. World Health Organization. A global brief on vector-borne diseases (No. WHO/DCO/WHO/2014.1). 2015. [cited June 16, 2022] Available from [https://urldefense.com/v3/\\_https://apps.who.int/iris/](https://urldefense.com/v3/_https://apps.who.int/iris/)



- [handle/10665/111008\\_!!DZ3fjg!9J0senuXj23LDAE6A9CkK7f4eSdh0zysIDp\\_w9SyN6ceeZTp6-SlhqFDRywxDAmbySq1PJka79J4KLIF2bjbNVvhytHw0o0A\\$](#)
7. Savic S, Vidic B, Grgic Z, Potkonjak A, Spasojevic L. Emerging vector-borne diseases—incidence through vectors. *Front Public Health*. 2014; 2. <https://doi.org/10.3389/fpubh.2014.00267> PMID: 25520951
  8. Torto B, & Tchouassi DP. Grand challenges in vector-borne disease control targeting vectors. *Front Trop Dis*. 2020; 1, 1
  9. Hagenlocher M. Supporting Vector-borne Disease Prevention and Control with Geo-information. In *Supporting Vector-borne Disease Prevention and Control with Geo-Information*. Herbert Wichmann Verlag; 2016.
  10. Malaney P. Micro-economic approaches to evaluating the burden of malaria. CID Working Paper No. 99, Center for International Development at Harvard University, Cambridge, MA; 2003. Available from [https://urldefense.com/v3/\\_https://www.hks.harvard.edu/sites/default/files/centers/cid/files/publications/faculty-working-papers/099.pdf\\_!!DZ3fjg!9J0senuXj23LDAE6A9CkK7f4eSdh0zysIDp\\_w9SyN6ceeZTp6SlhqFDRywxDAmbySq1PJka79J4KLIF2bjbNVvhy6IM1li4\\$](https://urldefense.com/v3/_https://www.hks.harvard.edu/sites/default/files/centers/cid/files/publications/faculty-working-papers/099.pdf_!!DZ3fjg!9J0senuXj23LDAE6A9CkK7f4eSdh0zysIDp_w9SyN6ceeZTp6SlhqFDRywxDAmbySq1PJka79J4KLIF2bjbNVvhy6IM1li4$)
  11. Baum SG. Zoonoses—with friends like this, who needs enemies? *Trans. Am. Clin. Climatol. Assoc*. 2008; 119, 39–51. PMID: 18596867
  12. Thongsripong P, Hyman JM, Kapan DD, Bennett SN. Human–mosquito contact: a missing link in our understanding of mosquito-borne disease transmission dynamics. *Ann Entomol Soc Am*. 2021; 114 (4), 397–414. <https://doi.org/10.1093/aesa/saab011> PMID: 34249219
  13. Klous G, Huss A, Heederik DJJ, Coutinho RA. Human–livestock contacts and their relationship to transmission of Zoonotic Pathogens, a systematic review of literature. *One Health*, 2016; 2, 65–76. <https://doi.org/10.1016/j.onehit.2016.03.001> PMID: 28616478
  14. Springer YP, Johnson PT. Large-scale health disparities associated with Lyme disease and human monocytic ehrlichiosis in the United States, 2007–2013. *PLoS One*. 2018; 13(9). <https://doi.org/10.1371/journal.pone.0204609> PMID: 30261027
  15. Hotez PJ. *Forgotten People, Forgotten Diseases: The Neglected Tropical Diseases and their Impact on Global Health and Development*. UK: ASM Press. 2013.
  16. Thornton PK. Livestock production: recent trends, future prospects. *Philos Trans R Soc Lond B Biol Sci*. 2010; 365(1554), 2853–2867. <https://doi.org/10.1098/rstb.2010.0134> PMID: 20713389
  17. Narladkar BW. Projected economic losses due to vector and vector-borne parasitic diseases in livestock of India and its significance in implementing the concept of integrated practices for Vector Management. *Vet World*. 2018; 11(2), 151–160. <https://doi.org/10.14202/vetworld.2018.151-160> PMID: 29657396
  18. Killeen GF, McKenzie FE, Foy BD, Bøgh C, Beier JC. The availability of potential hosts as a determinant of feeding behaviours and malaria transmission by African mosquito populations. *Trans R Soc Trop Med Hyg*. 2001; 95(5):469–76. [https://doi.org/10.1016/s0035-9203\(01\)90005-7](https://doi.org/10.1016/s0035-9203(01)90005-7) PMID: 11706651
  19. Zeru MA, Shibru S, Massebo F. Exploring the impact of cattle on human exposure to malaria mosquitoes in the Arba Minch area district of southwest Ethiopia. *Parasit Vectors*. 2020; 13(1), 1–8
  20. Seyoum A, Balcha F, Balkew M, Ali A, Gebre-Michael T. Impact of cattle keeping on human biting rate of anopheline mosquitoes and malaria transmission around Ziway, Ethiopia. *East Afr Med J*. 2002; 79 (9), 485–490. <https://doi.org/10.4314/eamj.v79i9.9121> PMID: 12625690
  21. Magona JW, Walubengo J. Mass-treatment and insecticide-spraying of animal reservoirs for emergency control of Rhodesiense sleeping sickness in Uganda. *J Vector Borne Dis*. 2011; 48(2), 105. PMID: 21715734
  22. Reye AL, Arinola OG, Hübschen JM, Muller CP. Pathogen prevalence in ticks collected from the vegetation and livestock in Nigeria. *Appl Environ Microbiol*. 2012; 78(8), 2562–2568 <https://doi.org/10.1128/AEM.06686-11> PMID: 22327584
  23. Mburu MM, Zembere K, Mzilahowa T, Terlouw AD, Malenga T, van den Berg H, et al. Impact of cattle on the abundance of indoor and outdoor resting malaria vectors in southern Malawi. *Malar J*. 2021; 20 (1), 1–11.
  24. Donnelly B, Berrang-Ford L, Ross NA, Michel P. A systematic, realist review of zoo-prophylaxis for malaria control. *Malar J*. 2015; 14(1), 1–16.
  25. Hasyim H, Dhimal M, Bauer J, Montag D, Groneberg DA, Kuch U, et al. Does livestock protect from malaria or facilitate malaria prevalence? A cross-sectional study in endemic rural areas of Indonesia. *Malar J*. 2018; 17(1), 1–11.

26. Asale A, Duchateau L, Devleeschauwer B, Huisman G, Yewhalaw D. Zoo-prophylaxis as a control strategy for malaria caused by the vector *Anopheles arabiensis* (Diptera: Culicidae): a systematic review. *Infect Dis Poverty*. 2017; 6(1), 1–14.
27. Boutron I, Hoffmann TC, Mulrow CD, Shamseer L, Tetzlaff JM, Ak EA et al. The PRISMA 2020 statement: an updated guideline for reporting systematic reviews. *BMJ*. 2021; 372(n71).
28. Madzimure J, Nyahangare ET, Hamudikuwanda H, Hove T, Stevenson PC, Belmain SR, et al. Acaricidal efficacy against cattle ticks and acute oral toxicity of *Lippia javanica* (Burm F.) Spreng. *Trop Anim Health Prod*. 2011; 43(2), 481–489. <https://doi.org/10.1007/s11250-010-9720-1> PMID: 20978842
29. Von Elm E, Altman DG, Egger M, Pocock SJ, Gøtzsche PC, Vandenbroucke JP. The Strengthening the Reporting of Observational Studies in Epidemiology (STROBE) statement: guidelines for reporting observational studies. *Bull World Health Organ*. 2007; 85, 867–872. <https://doi.org/10.2471/blt.07.045120> PMID: 18038077
30. McHugh ML. Interrater Reliability: The kappa statistic. *Biochem Med (Zagreb)*. 2012; 276–282. <https://doi.org/10.1016/j.jocd.2012.03.005> PMID: 23092060
31. Allan BF, Tallis H, Chaplin-Kramer R, Hockett S, Kowal VA, Musengezi J, et al. Can integrating wildlife and livestock enhance ecosystem services in central Kenya? *Front Ecol Environ*. 2017; 15(6), 328–335.
32. Keesing F, Allan BF, Young TP, Ostfeld RS. Effects of wildlife and cattle on tick abundance in central Kenya. *Ecological applications*. 2013; 23(6), 1410–1418. <https://doi.org/10.1890/12-1607.1> PMID: 24147412
33. Alhaji NB, Babalobi OO, Wungak Y, Ularamu HG. Participatory survey of Rift Valley fever in nomadic pastoral communities of North-central Nigeria: The associated risk pathways and factors. *PLoS Negl Trop Dis*. 2018; 12(10), e0006858. <https://doi.org/10.1371/journal.pntd.0006858> PMID: 30376568
34. Umhuza T, Berkvens D, Gafarasi I, Rukelibuga J, Mushonga B, Biryomumaisho S. Seroprevalence of Rift Valley fever in cattle along the Akagera-Nyabarongo rivers, Rwanda. *J S Afr Vet Assoc*. 2017; 88(0), e1–e5 <https://doi.org/10.4102/jsava.v88i0.1379> PMID: 28240033
35. Mhina AD, Kasanga CJ, Sindato C, Karimuribo ED, Mboera LE. Rift Valley fever potential mosquito vectors and their infection status in Ngorongoro district in Northern Tanzania. *Tanzan. J. Health Res*. 2015; 17(4).
36. Pooda HS, Rayaisse JB, Hien DF, Lefèvre T, Yerbanga SR, Bengaly Z, et al. Administration of ivermectin to peridomestic cattle: a promising approach to target the residual transmission of human malaria. *Malar J*. 2015; 14:1–2.
37. Iwashita H, Dida GO, Sonye GO, Sunahara T, Futami K, Njenga SM, et al. Push by a net, pull by a cow: can zoo-prophylaxis enhance the impact of insecticide treated bed nets on malaria control? *Parasit Vectors*. 2014; 7(1), 1–15.
38. Kawaguchi I, Sasaki A, Mogi M. Combining zoo-prophylaxis and insecticide spraying: a malaria-control strategy limiting the development of insecticide resistance in vector mosquitoes. *Proc R Soc Lond B Biol Sci*. 2004; 271(1536), 301–309.
39. Bogh C, Clarke SE, Pinder M, Sanyang F, Lindsay SW. Effect of passive zoo-prophylaxis on malaria transmission in the Gambia. *J Med Entomol*. 2001; 38:822–828 <https://doi.org/10.1603/0022-2585-38.6.822> PMID: 11761380
40. Yakob L. Endectocide-treated cattle for malaria control: a coupled entomological-epidemiological model. *Parasite Epidemiol Control*. 2016; 1(1):2–9.
41. Habtewold T., Prior A., Torr S. J., & Gibson G. (2004). Could insecticide-treated cattle reduce Afrotropical malaria transmission? Effects of deltamethrin-treated Zebu on *Anopheles arabiensis* behavior and survival in Ethiopia. *Med Vet Entomol*, 18(4), 408–417.
42. Kanojia PC. Ecological study on mosquito vectors of Japanese encephalitis virus in Bellary district, Karnataka. *IJMR*. 2007; 126(2):152–7. PMID: 17932442
43. Samuel PP, Thenmozhi V, Muniaraj M, Ramesh D, Jerald Leo SV, Balaji T, et al. (2018). Changing paradigm in the epidemiology of Japanese encephalitis in a non-endemic region. *J Vector Borne Dis*. 2018; 55(3), 203–207. <https://doi.org/10.4103/0972-9062.249130> PMID: 30618446
44. Bezerra CM, Barbosa SE, Souza RD, Barezani CP, Gürtler RE, Ramos AN, et al. *Triatoma brasiliensis* Neiva, 1911: food sources and diversity of *Trypanosoma cruzi* in wild and artificial environments of the semiarid region of Ceará, northeastern Brazil. *Parasit Vectors*. 2018; 11:1–4.
45. Lima-Neiva V, Toma HK, Abrantes Aguiar LM, Lopes CM, Dias LP, Monte Gonçalves TC, et al. The connection between *Trypanosoma cruzi* transmission cycles by *Triatoma brasiliensis brasiliensis*: A threat to human health in an area susceptible to desertification in the Seridó, Rio Grande do Norte, Brazil. *PLoS Negl Trop Dis*. 2021; 15(11):e0009919.

46. Hubálek Z, Halouzka J. West Nile fever—a reemerging mosquito-borne viral disease in Europe. *Emerg Infect Dis.* 1999; 5(5):643. <https://doi.org/10.3201/eid0505.990505> PMID: 10511520
47. McLean RG, Ubico SR, Bourne D, Komar N. West Nile virus in livestock and wildlife. *Curr Top Microbiol Immunol.* 2002; 271–308. [https://doi.org/10.1007/978-3-642-59403-8\\_14](https://doi.org/10.1007/978-3-642-59403-8_14) PMID: 12082994
48. Olaleye OD, Omilabu SA, Ilomechina EN, Fagbami AH. A survey for haemagglutination-inhibiting antibody to West Nile virus in human and animal sera in Nigeria. *Comp Immunol Microbiol Infect Dis.* 1990 Jan 1; 13(1):35–9. [https://doi.org/10.1016/0147-9571\(90\)90006-f](https://doi.org/10.1016/0147-9571(90)90006-f) PMID: 2323182
49. Thompson NN, Auguste AJ, Coombs D, Blitvich BJ, Carrington CV, da Rosa AP, Wang E, Chadee DD, Drebot MA, Tesh RB, Weaver SC. Serological evidence of flaviviruses and alphaviruses in livestock and wildlife in Trinidad. *Vector Borne Zoonotic Dis.* 2012; 12(11):969–78. <https://doi.org/10.1089/vbz.2012.0959> PMID: 22989182
50. Rutto JJ, Osano O, Thurairana EG, Kurgat RK, Odenyo VAO. Socio-economic and cultural determinants of human African trypanosomiasis at the Kenya–Uganda transboundary. *PLoS Negl Trop Dis.* 2013; 7(4), e2186. <https://doi.org/10.1371/journal.pntd.0002186> PMID: 23638206
51. Meisner J, Barnabas RV, Rabinowitz PM. A mathematical model for evaluating the role of trypanocide treatment of cattle in the epidemiology and control of *Trypanosoma brucei rhodesiense* and *T. b. gambiense* sleeping sickness in Uganda. *Parasite Epidemiol Control.* 2019; 5, e00106. <https://doi.org/10.1016/j.parepi.2019.e00106> PMID: 31061906
52. Hargrove JW, Ouifki R, Kajunguri D, Vale GA, Torr SJ. Modeling the control of trypanosomiasis using trypanocides or insecticide-treated livestock. *PLoS Negl Trop Dis.* 2012; 6(5), e1615. <https://doi.org/10.1371/journal.pntd.0001615> PMID: 22616017
53. Simarro PP, Cecchi G, Franco JR, Paone M, Diarra A, et al. Estimating and Mapping the Population at Risk of Sleeping Sickness. *PLoS Negl Trop Dis.* 2012; 6: e1859. <https://doi.org/10.1371/journal.pntd.0001859> PMID: 23145192
54. Glover PE. The importance of ecological studies in the control of tsetse flies. *Bull World Health Organ.* 1967; 37(4):581. PMID: 4874781
55. Richter D, & Matuschka FR. Modulatory effect of cattle on risk for Lyme disease. *Emerg Infect Dis.* 2006; 12(12), 1919 <https://doi.org/10.3201/eid1212.051552> PMID: 17326945
56. Matuschka FR, Eiffert H, Ohlenbusch A, Richter D, Schein E, Spielman A. Transmission of the agent of Lyme disease on a subtropical island. *Trop Med Parasitol.* 1994; 45(1), 39–44. PMID: 8066380
57. Msimang V, Weyer J, le Roux C, Kemp A, Burt FJ, Tempia S, et al. Risk factors associated with exposure to Crimean-Congo hemorrhagic fever virus in animal workers and cattle, and molecular detection in ticks, South Africa. *PLoS Negl Trop Dis.* 2021; 15(5), e0009384.
58. Nieto NC, Khan K, Uhliah G, Teglas MB. The emergence and maintenance of vector-borne diseases in the Khyber pakhtunkhwa province, and the federally administered tribal areas of Pakistan. *Front Physiol.* 2012; 3, 250. <https://doi.org/10.3389/fphys.2012.00250> PMID: 22934007
59. Yadav PD, Gurav YK, Mistry M, Shete AM, Sarkale P, Deoshatwar AR, et al. Emergence of Crimean-Congo hemorrhagic fever in Amreli district of Gujarat state, India, June to July 2013. *IJID.* 2014; 18, 97–100. <https://doi.org/10.1016/j.ijid.2013.09.019> PMID: 24211848
60. Mourya DT, Yadav PD, Shete AM, Gurav YK, Raut CG, Jadi RS, et al. Detection, isolation, and confirmation of Crimean-Congo hemorrhagic fever virus in human, ticks and animals in Ahmadabad, India, 2010–2011. *PLoS Neg Trop Dis.* 2012; 6(5), e1653. <https://doi.org/10.1371/journal.pntd.0001653> PMID: 22616022
61. Chinikar S, Ghiasi SM, Moradi M, Goya MM, Shirzadi MR, Zeinal M, et al. Geographical distribution, and surveillance of Crimean-Congo hemorrhagic fever in Iran. *Vector Borne Zoonotic Dis.* 2010; 10(7), 705–708. <https://doi.org/10.1089/vbz.2009.0247> PMID: 20854025
62. Okuthe OS, Buyu GE. Prevalence and incidence of tick-borne diseases in smallholder farming systems in the western-Kenya highlands. *Vet Parasitol.* 2006; 141(3–4):307–12. <https://doi.org/10.1016/j.vetpar.2006.05.016> PMID: 16824685
63. Hosseini-Vasoukolaei N, Oshaghi MA, Shayan P, Vatandoost H, Babamahmoudi F, Yaghoobi-Ershadi MR, Telmadarraiy Z, Mohtarami F. Anaplasma infection in ticks, livestock, and human in Ghaemshahr, Mazandaran Province, Iran. *J Arthropod Borne Dis.* 2014; 8(2):204. PMID: 26114134
64. Omondi D, Masiga DK, Fielding BC, Kariuki E, Ajamma YU, Mwamuye MM, et al. Molecular detection of tick-borne pathogen diversities in ticks from livestock and reptiles along the shores and adjacent islands of Lake Victoria and Lake Baringo, Kenya. *Front Vet Sci.* 2017; 4, 73. <https://doi.org/10.3389/fvets.2017.00073> PMID: 28620610
65. Yang J, Li Y, Liu Z, Liu J, Niu Q, Ren Q, Chen Z, Guan G, Luo J, Yin H. Molecular detection, and characterization of *Anaplasma* spp. in sheep and cattle from Xinjiang, northwest China. *Parasit Vectors.* 2015; 8:1–7.

66. Haapasalo K, Suomalainen P, Sukura A, Siikamäki H, Jokiranta TS. Fatal babesiosis in man, Finland, 2004. *Emerg Infect Dis*. 2010; 16(7), 1116. <https://doi.org/10.3201/eid1607.091905> PMID: 20587183
67. Skrabalo Z, Deanovic Z. Piroplasmosis in man; report of a case. *Doc Med Geogr Trop*. 1957; 9(1), 11–16. PMID: 13427667
68. Kumar A, O'Bryan J, Krause PJ. The Global Emergence of Human Babesiosis. *Pathogens*. 2021; 10(11), 1447 <https://doi.org/10.3390/pathogens10111447> PMID: 34832603
69. Vannier E, Gewurz BE, Krause PJ. Human babesiosis. *Infect Dis Clin North Am*. 2008 Sep 1; 22(3):469–88. <https://doi.org/10.1016/j.idc.2008.03.010> PMID: 18755385
70. Kobayashi D, Ohashi M, Osei JH, Agbosu E, Opoku M, Agbekudzi A, Joannides J, Fujita R, Sasaki T, Bonney JK, Dadzie S. Detection of a novel putative phlebovirus and first isolation of Dugbe virus from ticks in Accra, Ghana. *Ticks Tick Borne Dis*. 2017; 8(4):640–5. <https://doi.org/10.1016/j.ttbdis.2017.04.010> PMID: 28479064
71. Daodu OB, Eisenbarth A, Schulz A, Hartlaub J, Olopade JO, Oluwayelu DO, et al. Molecular detection of dugbe orthonairovirus in cattle and their infesting ticks (*Amblyomma* and *Rhipicephalus* (*Boophilus*)) in Nigeria. *PLoS Negl Trop Dis*. 2021; 15(11), e0009905. <https://doi.org/10.1371/journal.pntd.0009905> PMID: 34788303
72. Guilherme JM, Gonella-Legall C, Legall F, Nakoume E, Vincent J. Seroprevalence of five arboviruses in Zebu cattle in the Central African Republic. *Trans R Soc Trop Med Hyg*. 1996; 90(1), 31–33. [https://doi.org/10.1016/s0035-9203\(96\)90468-x](https://doi.org/10.1016/s0035-9203(96)90468-x) PMID: 8730305
73. EFSA Panel on Biological Hazards (BIOHAZ). (2015). Scientific opinion on the public health risks related to the consumption of raw drinking milk. *EFSA Journal*, 13(1), 3940.
74. Abdulhaq AA, Hershan AA, Karunamoorthi K, Al-Mekhlafi HM. Human Alkhurma hemorrhagic Fever: Emergence, history, and epidemiological and clinical profiles. *Saudi J Biol Sci*. 2022; 29(3):1900–10. <https://doi.org/10.1016/j.sjbs.2021.10.031> PMID: 35280532
75. Horton KC, Fahmy NT, Watany N, Zayed A, Mohamed A, Ahmed AA, et al. Crimean Congo hemorrhagic fever virus and Alkhurma (Alkhurma) virus in ticks in Djibouti. *Vector Borne Zoonotic Dis*. 2016; 16(10):680–2. <https://doi.org/10.1089/vbz.2016.1951> PMID: 27508862
76. Balasubramanian R, Yadav PD, Sahina S, Arathy Nadh V. Distribution, and prevalence of ticks on live-stock population in endemic area of Kyasanur forest disease in Western Ghats of Kerala, South India. *J Parasit Dis*. 2019; 43:256–62. <https://doi.org/10.1007/s12639-019-01086-7> PMID: 31263331
77. Kasabi GS, Murhekar MV, Yadav PD, Raghunandan R, Kiran SK, Sandhya VK, Channabasappa GH, Mishra AC, Mourya DT, Mehendale SM. Kyasanur forest disease, India, 2011–2012. *Emerg Infect Dis*. 2013; 19(2):278. <https://doi.org/10.3201/eid1902.120544> PMID: 23343570
78. Boshell M. Kyasanur Forest disease: Ecologic considerations. *Am J Trop Med Hyg*. 1969; 18(1). PMID: 5812658
79. Rajagopalan PK, Sreenivasan MA. Ixodid ticks on cattle and buffaloes in the Kyasanur forest disease area of Karnataka state. *IJMR*. 1981.
80. Adelabu OA, Iweriebor BC, Okoh AI, Obi LC. Phylogenetic profiling for zoonotic Ehrlichia spp. from ixodid ticks in the Eastern Cape, South Africa. *Transbound Emerg Dis*. 2019; 67(3):1247–56.
81. Cisak E, Wójcik-Fatla A, Zajac V, Sroka J, Buczek A, Dutkiewicz J. (2010). Prevalence of tick-borne encephalitis virus [TBEV] in samples of raw milk taken randomly from cows, goats, and sheep in Eastern Poland. *Ann Agric Environ Med*. 2010; 17(2), 283–286. PMID: 21186771
82. Ionescu LU, Alexse AU, Ceianu CO, Neculescu M, Popescu DI, Bicheru SI, Dumitrescu GA, CUM-PĂNĂȘOIU C, CUMPĂNĂȘOIU C, PASAT L, Tirziu E. Investigation methods used for identifying the presence of tick-borne encephalitis virus (TBEV) in vector arthropods. *Sci. Pap. Vet. Med*. 2009; 42:288–93.
83. Kumsa B, Socolovschi C, Raoult D, Parola P. Spotted fever group rickettsiae in ixodid ticks in Oromia, Ethiopia. *Ticks and tick-borne diseases*. 2015; 6(1):8–15. <https://doi.org/10.1016/j.ttbdis.2014.08.001> PMID: 25262832
84. Kelly PJ, Mason PR, Manning T, Slater S. Role of cattle in the epidemiology of tick-bite fever in Zimbabwe. *Journal of clinical microbiology*. 1991; 29(2):256–9. <https://doi.org/10.1128/jcm.29.2.256-259.1991> PMID: 2007631
85. Katswara T, Mukaratirwa S. Knowledge, attitudes, and practices on African tick bite fever of rural livestock communities living in a livestock-wildlife interface area in the Eastern Cape Province of South Africa. *BMC Infect Dis*. 2021; 21(1):1–1.
86. Rodríguez-Vivas RI, Apanaskevich DA, Ojeda-Chi MM, Trinidad-Martínez I, Reyes-Novelo E, Esteve-Gassent MD, de León AP. Ticks collected from humans, domestic animals, and wildlife in Yucatan, Mexico. *Vet Parasitol*. 2016; 215:106–13. <https://doi.org/10.1016/j.vetpar.2015.11.010> PMID: 26790745

87. von Fricken ME, Lkhagvatseren S, Boldbaatar B, Nymadawa P, Weppelmann TA, Baigalmaa BO, et al. Estimated seroprevalence of *Anaplasma* spp. and spotted fever group Rickettsia exposure among herders and livestock in Mongolia. *Acta tropica*. 2018; 177, 179–185. <https://doi.org/10.1016/j.actatropica.2017.10.015> PMID: 29054570
88. Liu QH, Chen GY, Jin Y, Te M, Niu LC, Dong SP, et al. Evidence for a high prevalence of spotted fever group rickettsial infections in diverse ecologic zones of Inner Mongolia. *Epidemiol Infect* 1995 Aug; 115(1):177–83. <https://doi.org/10.1017/s0950268800058246> PMID: 7641832
89. Koka H, Sang R, Kutima HL, Musila, L. *Coxiella burnetii* detected in tick samples from pastoral communities in Kenya. *BioMed Res Int*. 2018
90. Rapti D, Postoli R, Bizhga B, Zalla P, Koleci X, Selmani R. PRELIMINARY DATA ON SEROLOGICAL INVESTIGATION TO Q FEVER, LYME DISEASE AND ECHINOCOCCUS IN ALBANIA. *Maced J Med Sci*. 2011; 1(1), 21–25
91. Derrick EH. The epidemiology of Q fever. *Epidemiol Infect*. 1944; 43(5):357–61. <https://doi.org/10.1017/s0022172400013085> PMID: 20475697
92. Barnett PG, Singh SP, Bern C, Hightower AW, Sundar, S. Virgin soil: the spread of visceral leishmaniasis into Uttar Pradesh, India. *Am J Trop Med Hyg*. 2005; 73(4), 720–725
93. Bern C, Hightower AW, Chowdhury R, Ali M, Amann J, Wagatsuma Y, et al. Risk factors for kala-azar in Bangladesh. *Emerg Infect Dis*. 2005; 11(5), 655. <https://doi.org/10.3201/eid1105.040718> PMID: 15890115
94. Bern C, Joshi AB, Jha SN, Das ML, Hightower A, Thakur GD, et al. Factors associated with visceral leishmaniasis in Nepal: bed-net use is strongly protective. *Am J Trop Med Hyg*. 2000; 63(3), 184–188. <https://doi.org/10.4269/ajtmh.2000.63.184> PMID: 11388512
95. Bern C, Courtenay O, Alvar J. Of cattle, sand flies and men: a systematic review of risk factor analyses for South Asian visceral leishmaniasis and implications for elimination. *PLoS Negl Trop Dis*. 2010; 4(2), e599. <https://doi.org/10.1371/journal.pntd.0000599> PMID: 20161727
96. Bucheton B, Kheir MM, El-Safi SH, Hammad A, Mergani A, Mary C, et al. The interplay between environmental and host factors during an outbreak of visceral leishmaniasis in eastern Sudan. *Microbes and infection*. 2002; 4(14):1449–57. [https://doi.org/10.1016/s1286-4579\(02\)00027-8](https://doi.org/10.1016/s1286-4579(02)00027-8) PMID: 12475635
97. Singh R, Lal S, Saxena VK. Breeding ecology of visceral leishmaniasis vector sandfly in Bihar state of India. *Acta tropica*. 2008; 107(2):117–20. <https://doi.org/10.1016/j.actatropica.2008.04.025> PMID: 18555206
98. Votýpka J, Kasap OE, Volf P, Kodym P, Alten B. Risk factors for cutaneous leishmaniasis in Cukurova region, Turkey. *Trans R Soc Trop Med Hyg*. 2012; 106(3):186–90. <https://doi.org/10.1016/j.trstmh.2011.12.004> PMID: 22284721
99. Mathur KK, Harpalani G, Kalra NL, Murthy GG, Narasimham MV. Epidemic of malaria in Barmer district (Thar desert) of Rajasthan during 1990. *Indian J Malariol*. 1992; 29(1):1–0. PMID: 1459294
100. Lugaj A, Koni M, Mertens M, Groschup M, Berxholi K. Serological survey of Crimean-Congo hemorrhagic fever virus in cattle in Berat and Kolonje, Albania. *AJAS*. 2014; 325.
101. Lancelot R, Béal M, Rakotoharinome VM, Andriamandimby SF, Héraud JM, Coste C, et al. Drivers of Rift Valley fever epidemics in Madagascar. *PNAS*. 2017; 114(5), 938–943. <https://doi.org/10.1073/pnas.1607948114> PMID: 28096420
102. Napp S, Chevalier V, Busquets N, Calistri P, Casal J, Attia M, et al. Understanding the legal trade of cattle and camels and the derived risk of Rift Valley Fever introduction into and transmission within Egypt. *PLoS Negl Trop Dis*. 2018; 12(1), e0006143. <https://doi.org/10.1371/journal.pntd.0006143> PMID: 29351273
103. Selby R, Bardosh K, Picozzi K, Waiswa C, Welburn SC. Cattle movements, and trypanosomes: restocking efforts and the spread of *Trypanosoma brucei rhodesiense* sleeping sickness in post-conflict Uganda. *Parasit Vectors*. 2013; 6(1), 1–12. <https://doi.org/10.1186/1756-3305-6-281> PMID: 24289452
104. De Zoysa AP, Mendis C, Gamage-Mendis AC, Weerasinghe S, Herath PR, Mendis KN. A mathematical model for *Plasmodium vivax* malaria transmission: estimation of the impact of transmission-blocking immunity in an endemic area. *Bull World Health Organ*. 1991; 69(6):725. PMID: 1786621
105. Bouma M, Rowland M. Failure of passive zoo-prophylaxis: cattle ownership in Pakistan is associated with a higher prevalence of malaria. *Trans Roy Soc Trop Med Hyg*. 1995; 89(4), 351–353. [https://doi.org/10.1016/0035-9203\(95\)90004-7](https://doi.org/10.1016/0035-9203(95)90004-7) PMID: 7570859
106. Mustafa ML, Ayazi E, Mohareb E, Yingst S, Zayed A, Rossi CA, et al. Crimean-Congo hemorrhagic fever, Afghanistan, 2009. *Emerg Infect Dis*. 2011; 17(10), 1940. <https://doi.org/10.3201/eid1710.110061> PMID: 22000377



107. Joshi MV, Patil DR, Tupe CD, Umarani UB, Ayachit VM, Geevarghese G, et al. Incidence of neutralizing antibodies to Chandipura virus in domestic animals from Karimnagar and Warangal Districts of Andhra Pradesh, India. *Acta virologica*. 2005 Jan 1; 49(1):69–71.
108. Bárdoš V, Sixl W, Wisidagama CL, Halouzka J, Stünzner D, Hubálek Z, et al. Prevalence of arbovirus antibodies in sera of animals in Sri Lanka. *Bull World Health Organ*. 1983; 61(6):987. PMID: [6609014](#)
109. McLean RK, Graham SP. The pig as an amplifying host for new and emerging zoonotic viruses. *One Health*. 2022; 100384. <https://doi.org/10.1016/j.onehlt.2022.100384> PMID: [35392655](#)
110. Alhaji NB, Babalobi OO, Isola TO. A quantitative exploration of nomadic pastoralists' knowledge and practices towards Rift Valley fever in Niger State, North-central Nigeria: The associated socio-cultural drivers. *One Health*. 2018 Dec 1; 6:16–22. <https://doi.org/10.1016/j.onehlt.2018.09.001> PMID: [30258968](#)
111. Horton KC, Wasfy M, Samaha H, Abdel-Rahman B, Safwat S, Abdel Fadeel M, et al. Serosurvey for zoonotic viral and bacterial pathogens among slaughtered livestock in Egypt. *Vector Borne Zoonotic Dis*. 2014; 14(9), 633–639. <https://doi.org/10.1089/vbz.2013.1525> PMID: [25198525](#)
112. Murase Y, Konnai S, Hidano A, Githaka NW, Ito T, Takano A, et al. Molecular detection of *Anaplasma phagocytophilum* in cattle and *Ixodes persulcatus* ticks. *Vet Microbiol*. 2011; 149(3–4), 504–507. <https://doi.org/10.1016/j.vetmic.2010.11.025> PMID: [21146335](#)
113. Mourya DT, Yadav PD, Shete A, Majumdar TD, Kanani A, Kapadia D, et al. Serosurvey of Crimean-Congo hemorrhagic fever virus in domestic animals, Gujarat, India, 2013. *Vector-Borne Zoonotic Dis*. 2014 Sep 1; 14(9):690–2. <https://doi.org/10.1089/vbz.2014.1586> PMID: [25229708](#)
114. Zoo-prophylaxis Saul A., or zoo potentiation: the outcome of introducing animals on vector transmission is highly dependent on the mosquito mortality while searching. *Malar J*. 2003; 2(1), 1–18.
115. World Health Organization (WHO). World Malaria Report 2015. Geneva: World Health Organization; 2015. [cited on November 12, 2022] Available from [https://urldefense.com/v3/\\_https://apps.who.int/iris/handle/10665/200018\\_!!DZ3fig!9J0senuXj23LDAE6A9CkK7f4eSdh0zysIDp\\_w9SyN6ceeZTp6-SlhqFDRywxDAmbySq1PJKa79J4KLIF2bjbNVvhyczlv-rk\\$](https://urldefense.com/v3/_https://apps.who.int/iris/handle/10665/200018_!!DZ3fig!9J0senuXj23LDAE6A9CkK7f4eSdh0zysIDp_w9SyN6ceeZTp6-SlhqFDRywxDAmbySq1PJKa79J4KLIF2bjbNVvhyczlv-rk$)
116. Nasci RS, McLaughlin RE, Focks D, Billodeaux JS. Effect of Topically Treating Cattle with Permethrin on Blood Feeding of *Psorophora columbiae* (Diptera: Culicidae) in a Southwestern Louisiana Rice—Pasture Ecosystem. *J Med Ent*. 1990; 27(6), 1031–1034.
117. Schmidtman ET, Lloyd JE, Bobian RJ, Kumar R, Waggoner JW, et al. Suppression of mosquito (Diptera: Culicidae) and black fly (Diptera: Simuliidae) blood feeding from Hereford cattle and ponies treated with permethrin. *J Med Ent*. 2001; 38: 728–734 <https://doi.org/10.1603/0022-2585-38.5.728> PMID: [11580047](#)
118. Poche DM, Wang HH, Grant WE. Visceral leishmaniasis on the Indian Subcontinent: Efficacy of fipronil-based cattle treatment in controlling sand fly populations is dependent on specific aspects of sand fly ecology. *PLoS Negl Trop. Dis*. 2020; 14, e0008011. <https://doi.org/10.1371/journal.pntd.0008011> PMID: [32069283](#)
119. Poche R. M., Githaka N., Van Gool F., Kading R. C., Hartman D., Polyakova L., et al. Preliminary efficacy investigations of oral fipronil against *Anopheles arabiensis* when administered to Zebu cattle (*Bos indicus*) under field conditions. *Acta Trop*. 2017; 176, 126–133. <https://doi.org/10.1016/j.actatropica.2017.07.030> PMID: [28760483](#)
120. Poche DM, Grant WE, Wang HH. Visceral leishmaniasis on the Indian subcontinent: modelling the dynamic relationship between vector control schemes and vector life cycles. *PLoS Negl Trop. Dis*. 2016; 10(8):e0004868. <https://doi.org/10.1371/journal.pntd.0004868> PMID: [27537774](#)
121. Walker AR. Eradication and control of livestock ticks: biological, economic, and social perspectives. *Parasitology*. 2011; 138, pp. 945–959 <https://doi.org/10.1017/S0031182011000709> PMID: [21733257](#)
122. Mutavi F, Heitkönig I, Wieland B, Aarts N, Van Paassen A. Tick treatment practices in the field: Access to, knowledge about, and on-farm use of acaricides in Laikipia, Kenya. *Ticks Tick-borne Dis*. 2021; 12(5), 101757. <https://doi.org/10.1016/j.ttbdis.2021.101757> PMID: [34147920](#)
123. Jellison WL, Bell EJ. Q fever studies in southern California; occurrence of *Coxiella burneti* in the spinose ear tick, *Otobius megnini*. *Public Health Rep (Washington, DC)*. 1948 Nov 1; 63(46):1483–9.
124. McDaniel CJ, Cardwell DM, Moeller RB, Gray GC. Humans and cattle: a review of bovine zoonoses. *Vector Borne Zoonotic Dis*. 2014; 14(1), 1–19. <https://doi.org/10.1089/vbz.2012.1164> PMID: [24341911](#)
125. Haydon DT, Cleaveland S, Taylor LH., Laurenson MK. Identifying reservoirs of infection: a conceptual and practical challenge. *Emerg Infect Dis*. 2002; 8(12), 1468–1473.

126. Viana M, Mancy R, Biek R, Cleaveland S, Cross PC, Lloyd-Smith JO, et al. Assembling evidence for identifying reservoirs of infection. *Trend Ecol Evol.* 2014; 29(5), 270–279. <https://doi.org/10.1016/j.tree.2014.03.002> PMID: 24726345
127. “Amplifying host.” Merriam-Webster.com Dictionary, Merriam-Webster, [cited on November 10, 2022]. Available from [https://urldefense.com/v3/\\_https://www.merriam-webster.com/dictionary/amplifying\\*20host\\_;JQ!!DZ3fjg!9J0senuXj23LDAE6A9CkK7f4eSdh0zysIDp\\_w9SyN6ceeZTp6SlhqFDRywxDAmbySq1PJKa79J4KLIF2bjbNVvhywCvXnac\\$](https://urldefense.com/v3/_https://www.merriam-webster.com/dictionary/amplifying*20host_;JQ!!DZ3fjg!9J0senuXj23LDAE6A9CkK7f4eSdh0zysIDp_w9SyN6ceeZTp6SlhqFDRywxDAmbySq1PJKa79J4KLIF2bjbNVvhywCvXnac$)
128. Chen L, Chen S, Kong P, Zhou L. Host competence, interspecific competition and vector preference interact to determine the vector-borne infection ecology. *Front Ecology Evol.* 2022; 834.
129. Bogh C, Clarke SE, Walraven GEL, Lindsay SW. Zoo-prophylaxis, artefact, or reality? A paired-cohort study of the effect of passive zoo-prophylaxis on malaria in The Gambia. *Trans R Soc Trop Med Hyg.* 2002; 96:593–596 [https://doi.org/10.1016/s0035-9203\(02\)90320-2](https://doi.org/10.1016/s0035-9203(02)90320-2) PMID: 12625129
130. Tirados I, Gibson G, Young S, Torr SJ. Are herders protected by their herds? An experimental analysis of zoo-prophylaxis against the malaria vector *Anopheles arabiensis*. *Malar J.* 2011; 10:68 <https://doi.org/10.1186/1475-2875-10-68> PMID: 21435266
131. Sota T., & Mogi M. Effectiveness of zoo-prophylaxis in malaria control: a theoretical inquiry, with a model for mosquito populations with two bloodmeal hosts. *Med Vet Entomol.* 1989; 3(4), 337–345. <https://doi.org/10.1111/j.1365-2915.1989.tb00240.x> PMID: 2519684
132. Schultz G. W. Animal influence on man-biting rates at a malarious site in Palawan, Philippines. *South-east Asian J Trop Med Public Health.* 1989; 20(1), 49–53. PMID: 2505393
133. Ghebreyesus TA, Haile M, Witten KH, Getachew A, Yohannes M, Lindsay SW, et al. Household risk factors for malaria among children in the Ethiopian highlands. *Trans Roy Soc Trop Med Hyg.* 2000; 94(1), 17–21. [https://doi.org/10.1016/s0035-9203\(00\)90424-3](https://doi.org/10.1016/s0035-9203(00)90424-3) PMID: 10748890
134. Mayagaya VS, Nkwengulila G, Lyimo IN, Kihonda J, Mtambala H, Ngonyani H, et al. The impact of livestock on the abundance, resting behaviour and sporozoite rate of malaria vectors in southern Tanzania. *Malar J.* 2015; 14(1), 1–14. <https://doi.org/10.1186/s12936-014-0536-8> PMID: 25604150
135. Poldy J. Volatile cues influence host-choice in arthropod pests. *Animals.* 2020; 10(11):1984. <https://doi.org/10.3390/ani10111984> PMID: 33126768
136. Chorley TW. *Glossina pallidipes* Austen attracted by the Scent of Cattle-dung and Urine (Diptera). *Proc R Entomol.* 1948 (Vol. 23, No. pt. 1–3). London.
137. Simarro PP, Cecchi G, Paone M, Franco JR, Diarra A, Ruiz JA, et al. The Atlas of human African trypanosomiasis: a contribution to global mapping of neglected tropical diseases. *Int J Health Geogr.* 2010; 9(1):1–8. <https://doi.org/10.1186/1476-072X-9-57> PMID: 21040555
138. Anderson CR, Singh KRP. The reaction of cattle to Kyasanur Forest disease virus. *IJMR.* 1971; 59(2), 195–8. PMID: 5579235
139. M'ghirbi Y, Bèji M, Oporto B, Khrouf F, Hurtado A, Bouattour A. *Anaplasma marginale* and *A. phagocytophilum* in cattle in Tunisia. *Parasit Vectors.* 2016; 9(1), 1–8. <https://doi.org/10.1186/s13071-016-1840-7> PMID: 27765073
140. de la Fuente, Contreras M. Tick vaccines: current status and future directions. *Expert Rev Vaccines.* 2015; 14(10), 1367–1376. <https://doi.org/10.1586/14760584.2015.1076339> PMID: 26289976
141. Madariaga MG. Q fever wildlife reservoir. *Emerg Infect Dis.* 2005; 11(5): 776–777. <https://doi.org/10.3201/eid1105.041272> PMID: 15898176
142. Minnick MF, Raghavan R. Genetics of *Coxiella burnetii*: on the path of specialization. *Futur Microbiol.* 2011; 6(11), 1297–1314. <https://doi.org/10.2217/fmb.11.116> PMID: 22082290
143. Lagare A, Fall G, Ibrahim A, Ousmane S, Sadio B, Abdoulaye M, et al. First occurrence of Rift Valley fever outbreak in Niger, 2016. *Vet Med Sci.* 2019; 5(1), 70–78. <https://doi.org/10.1002/vms3.135> PMID: 30411868
144. Rai MA, Khanani MR, Warraich HJ, Hayat A, Ali SH. Crimean-Congo hemorrhagic fever in Pakistan. *J Med Virol.* 2008; 80(6), 1004–1006. <https://doi.org/10.1002/jmv.21159> PMID: 18428123
145. Nyakarahuka L, de St. Maurice A, Purpura L, Ervin E, Balinandi S, Tumusiime A, et al. Prevalence and risk factors of Rift Valley fever in humans and animals from Kabale district in Southwestern Uganda, 2016. *PLoS Negl Trop Dis.* 2018; 12(5), e0006412. <https://doi.org/10.1371/journal.pntd.0006412> PMID: 29723189
146. Centers for Disease Control and Prevention (CDC). (2019). Q Fever Transmission. [cited November 10, 2022] Available from [https://urldefense.com/v3/\\_https://www.cdc.gov/qfever/transmission/index.html\\_;!!DZ3fjg!9J0senuXj23LDAE6A9CkK7f4eSdh0zysIDp\\_w9SyN6ceeZTp6SlhqFDRywxDAmbySq1PJKa79J4KLIF2bjbNVvhyEVwQzKY\\$.](https://urldefense.com/v3/_https://www.cdc.gov/qfever/transmission/index.html_;!!DZ3fjg!9J0senuXj23LDAE6A9CkK7f4eSdh0zysIDp_w9SyN6ceeZTp6SlhqFDRywxDAmbySq1PJKa79J4KLIF2bjbNVvhyEVwQzKY$.)

147. Ansari JA, Khan MA, Ranjha MA, Rathore TR, Khan G, Salman M, et al. CRIMEAN CONGO HEMORRHAGIC FEVER IN PAKISTAN: CASE CONTROL STUDY, 2012–2015. *Pak J Pub Health*. 2018; 8(1), 22–26.
148. Mehla R, Kumar SR, Yadav P, Barde PV, Yergolkar PN, Erickson BR, Carroll SA, Mishra AC, Nichol ST, Mourya DT. Recent ancestry of Kyasanur Forest disease virus. *Emerg Infect Dis*. 2009; 15(9):1431. <https://doi.org/10.3201/eid1509.080759> PMID: 19788811
149. Ellwanger JH, Chies JA. Zoonotic spillover: Understanding basic aspects for better prevention. *Genet. Mol. Biol*. 2021; 44. <https://doi.org/10.1590/1678-4685-GMB-2020-0355> PMID: 34096963
150. Jones BA, Grace D, Kock R, Alonso S, Rushton J, Said MY, et al. Zoonosis emergence linked to agricultural intensification and environmental change. *PNAS*. 2013; 110(21), 8399–8404. <https://doi.org/10.1073/pnas.1208059110> PMID: 23671097
151. Chaccour CJ, Ngha'bi K, Abizanda G, Irigoyen Barrio A, Aldaz A, Okumu F, et al. Targeting cattle for malaria elimination: marked reduction of *Anopheles arabiensis* survival for over six months using a slow release ivermectin implant formulation. *Parasit Vectors*. 2018; 11(1), 1–9.
152. Franco AO, Gomes MGM, Rowland M, Coleman PG, Davies CR. Controlling malaria using livestock-based interventions: a one health approach. *PLoS One*. 2014; 9(7), e101699. <https://doi.org/10.1371/journal.pone.0101699> PMID: 25050703
153. Rowland M, Durrani N, Kenward M, Mohammed N, Urahman H, et al. Control of malaria in Pakistan by applying deltamethrin insecticide to cattle: a community-randomized trial. *Lancet*. 2001; 357: 1837–1841.
154. Ruiz-Castillo P, Rist C, Rabinovich R, Chaccour C. Insecticide-treated livestock: a potential One Health approach to malaria control in Africa. *Trends Parasitol*. 2021. <https://doi.org/10.1016/j.pt.2021.09.006> PMID: 34756820
155. Bekele J, Asmare K, Abebe G, Ayelet G, Gelaye E. Evaluation of Deltamethrin applications in the control of tsetse and trypanosomiasis in the southern rift valley areas of Ethiopia. *Vet Parasitol*. 2010; 168: 177–184 <https://doi.org/10.1016/j.vetpar.2009.11.028> PMID: 20060647
156. Ruiz-Fons F, Fernández-de-Mera IG, Acevedo P, Gortázar C, de la Fuente J. Factors driving the abundance of *Ixodes ricinus* ticks and the prevalence of zoonotic *I. ricinus*-borne pathogens in natural foci. *Appl Environ Microbiol*. 2012; 78(8), 2669–2676. <https://doi.org/10.1128/AEM.06564-11> PMID: 22286986
157. Eisler MC, Torr SJ, Coleman PG, Machila N, Morton JF. Integrated control of vector-borne diseases of livestock—pyrethroids: panacea or poison? *TRENDS Parasitol*. 2003; 19(8), 341–345. [https://doi.org/10.1016/s1471-4922\(03\)00164-8](https://doi.org/10.1016/s1471-4922(03)00164-8) PMID: 12901934
158. Njoroge MM, Tirados I, Lindsay SW, Vale GA, Torr SJ, Fillinger U. Exploring the potential of using cattle for malaria vector surveillance and control: a pilot study in western Kenya. *Parasit Vectors*. 2017; 10(1), 1–16.
159. Sokhna C, Ndiath MO, Rogier C. The changes in mosquito vector behavior and the emerging resistance to insecticides will challenge the decline of malaria. *Clin Microbiol Infect*. 2013; 19(10):902–7.
160. Nyasembe VO, Tchouassi DP, Kirwa HK, Foster WA, Teal PE, Borgemeister C, et al. Development and assessment of plant-based synthetic odor baits for surveillance and control of malaria vectors. *PLoS One*. 2014; 9(2), e89818. <https://doi.org/10.1371/journal.pone.0089818> PMID: 24587059
161. Mweresa CK, Mukabana WR, van Loon JJA, Dicke M, Takken W. Use of semiochemicals for surveillance and control of hematophagous insects. *Chemoecology*. 2020; 30(6), 277–286.
162. Wooding M, Naudé Y, Rohwer E, Bouwer M. Controlling mosquitoes with semiochemicals: a review. *Parasit Vectors*. 2020; 13(1), 1–20.
163. Mafra-Neto A, Saroli J, da Silva RO, Mboera LE, White GB, Foster W, et al. Getting them where they live—semiochemical-based strategies to address major gaps in vector control programs: Vectrax, SPLAT BAC, Trojan Cow, and SPLAT TK. In *Advances in the Biorational Control of Medical and Veterinary Pests* (pp. 101–152). American Chem Soc. 2018.
164. El-Shafie HAF, Faleiro JR. Semiochemicals and their potential use in pest management. *Biological control of pest and vector insects*. 2017; 10–5772.
165. Hammond AM, Galizi R. Gene drives to fight malaria: current state and future directions. *Pathog Glob Health*. 2017; 111:412–23 <https://doi.org/10.1080/20477724.2018.1438880> PMID: 29457956
166. Anders KL, Indriani C, Ahmad RA, Tantowijoyo W, Arguni E, Andari B, et al. The AWED trial (Applying Wolbachia to Eliminate Dengue) to assess the efficacy of Wolbachia-infected mosquito deployments to reduce dengue incidence in Yogyakarta, Indonesia: study protocol for a cluster randomised controlled trial. *Trials*. 2018; 19:302 <https://doi.org/10.1186/s13063-018-2670-z> PMID: 29855331

167. Wilson AL, Courtenay O, Kelly-Hope LA, Scott TW, Takken W, Torr SJ, et al. The importance of vector control for the control and elimination of vector-borne diseases. *PLoS Negl Trop Dis*. 2020; 14(1): e0007831. <https://doi.org/10.1371/journal.pntd.0007831> PMID: 31945061
168. Zhou Z, Li K, Sun Y, Shi J, Li H, Chen Y, Yang H, Li X, Wu B, Li X, Wang Z. Molecular epidemiology, and risk factors of *Anaplasma* spp., *Babesia* spp. and *Theileria* spp. infection in cattle in Chongqing, China. *PloS One*. 2019; 14(7):e0215585. <https://doi.org/10.1371/journal.pone.0215585> PMID: 31306422
169. Farjana T, Ahmmed MS, Khanom TF, Alam N, Begum N. Surveillance of mosquitoes larva at selected areas of Mymensingh district in Bangladesh. *Bangladesh J. Vet Med*. 2015; 13(1), 79–88.
170. Rjeibi MR, Ayadi O, Rekik M, Gharbi M. Molecular survey, and genetic characterization of *Anaplasma centrale*, *A. marginale* and *A. bovis* in cattle from Algeria. *Trans Emerg Dis*. 2018; 65(2), 456–464. <https://doi.org/10.1111/tbed.12725> PMID: 29034616
171. da Silva JB, Vinhote WMS, Oliveira CMC, André MR, Machado RZ, da Fonseca AH, et al. Molecular and serological prevalence of *Anaplasma marginale* in water buffaloes in northern Brazil. *Ticks Tick-Borne Dis*. 2014; 5(2), 100–104. <https://doi.org/10.1016/j.ttbdis.2013.09.007> PMID: 24246707
172. Sriwichai P, Samung Y, Sumruayphol S, Kiattibutr K, Kumpitak C, Payakkapol A, et al. Natural human *Plasmodium* infections in major *Anopheles* mosquitoes in western Thailand. *Parasit Vectors*. 2016; 9(1), 1–9. <https://doi.org/10.1186/s13071-016-1295-x> PMID: 26762512
173. Barros SL, Madruga CR, Araújo FR, Menk CF, de Almeida MAO, Melo EP, et al. Serological survey of *Babesia bovis*, *Babesia bigemina*, and *Anaplasma marginale* antibodies in cattle from the semi-arid region of the state of Bahia, Brazil, by enzyme-linked immunosorbent assays. *Memórias do Instituto Oswaldo Cruz*. 2005; 100, 513–517. <https://doi.org/10.1590/s0074-02762005000600003> PMID: 16302060
174. Azmi SA, Das S, Chatterjee S. Seasonal prevalence, and blood meal analysis of filarial vector *Culex quinquefasciatus* in coastal areas of Digha, West Bengal, India. *J Vector Borne Dis*. 2015; 52(3), 252. PMID: 26418657
175. Gonzalez J, Echaide I, Pabón A, Piñeros JJG, Blair S, Tobón-Castaño A. Babesiosis prevalence in malaria-endemic regions of Colombia. *J Vector Borne Dis*. 2018; 55(3), 222. <https://doi.org/10.4103/0972-9062.249480> PMID: 30618449
176. Pfaff F, Francois A, Hommel D, Jeanne I, Margery J, Guillot G, et al. Q fever in French Guiana: new trends. *Emerg Infect Dis*. 1998 Jan; 4(1):131. <https://doi.org/10.3201/eid0401.980124> PMID: 9454566
